# Supplementary material for: Theoretical study on hydrogen transfer in the dissociation of dimethyl disulfide radical cations
Source: Royal Society of Chemistry journal article supplement (doi:10.1039/d2cp05395k), 2022-12-21
Supplement: d2cp05395k1.pdf [file d2cp05395k1.pdf]

## **Theoretical Study on Hydrogen Transfer in the Dissociation of Dimethyl Disulfide Radical Cation**

Yuan-Yuan Cheng,<sup>\*a</sup> Cheng-Xing Cui<sup>\*b</sup>

<sup>a</sup> *Jiangxi Key Laboratory for Mass Spectrometry and Instrumentation, East China University of Technology, Nanchang, China. E-mail: cyy@ecut.edu.cn.*

<sup>b</sup> *Department of Chemistry and Chemical Engineering, Henan Institute of Science and Technology, Xinxiang, China. E-mail: chengxingcui@hist.edu.cn.*

**Table S1** For each pathway, the involved sub-steps, free energy barriers of the rate-determining steps and sub-steps, and reaction free energy changes of sub-steps. The names and mechanisms of ten HT processes. Here, sub-steps going through transition states are all HT processes. The unit of energy is kcal•mol<sup>-1</sup>.

| Pathway for <b>R</b>      | Sub-step                  | Free energy barrier |          | Reaction free energy |            | HT name | HT mechanism |
|---------------------------|---------------------------|---------------------|----------|----------------------|------------|---------|--------------|
|                           |                           | RDS                 | Sub-step | change               |            |         |              |
|                           |                           |                     |          | Sub-step             |            |         |              |
| <b>a</b>                  | <b>R → TS1 → Int1</b>     | 52.5                | 52.5     | 23.1                 | 1,3-C,S-HT | HAT     |              |
|                           | <b>Int1 → P1/P2</b>       |                     | -        | 20.5/21.8            | -          | -       |              |
|                           | <b>R → TS1 → Int1</b>     |                     | 52.5     | 23.1                 | 1,3-C,S-HT | HAT     |              |
| <b>b</b>                  | <b>Int1 → Int2</b>        | 52.5                | -        | -2.3                 | -          | -       |              |
|                           | <b>Int2 → TS2 → Int4</b>  |                     | 18.4     | -9.7                 | 1,3-S,S-HT | HAT     |              |
|                           | <b>Int4 → P3</b>          |                     | -        | 33.3                 | -          | -       |              |
| <b>c</b>                  | <b>R → TS1 → Int1</b>     | 52.5                | 52.5     | 23.1                 | 1,3-C,S-HT | HAT     |              |
|                           | <b>Int1 → Int2</b>        |                     | -        | -2.3                 | -          | -       |              |
|                           | <b>Int2 → TS3 → Int5a</b> |                     | 30.6     | 18.0                 | 1,4-C,S-HT | HAT     |              |
| <b>d</b>                  | <b>Int5a → P4</b>         |                     | -        | 14.7                 | -          | -       |              |
|                           | <b>R → TS1 → Int1</b>     |                     | 52.5     | 23.1                 | 1,3-C,S-HT | HAT     |              |
|                           | <b>Int1 → Int3</b>        | 52.5                | -        | 11.3                 | -          | -       |              |
| <b>Int3 → TS4 → Int5b</b> | 15.1                      |                     | 4.4      | 1,1'-C,S-HT          | HAT        |         |              |
| <b>e</b>                  | <b>Int5b → P4</b>         |                     | -        | 14.7                 | -          | -       |              |
|                           | <b>R → TS5 → Int6</b>     | 63.4                | 63.4     | 40.0                 | 1,2-C,S-HT | HAT     |              |
|                           | <b>Int6 → P3</b>          |                     | -        | 4.4                  | -          | -       |              |

  

| Pathway for <b>R-w</b> | Sub-step                    | Free energy barrier |          | Reaction free energy |            | HT name | HT mechanism |
|------------------------|-----------------------------|---------------------|----------|----------------------|------------|---------|--------------|
|                        |                             | RDS                 | Sub-step | change               |            |         |              |
|                        |                             |                     |          | Sub-step             |            |         |              |
| <b>a-w</b>             | <b>R-w → TS1-w → Int1-w</b> | 38.0                | 38.0     | 21.0                 | 1,3-C,S-HT | cE2PT   |              |
|                        | <b>Int1-w → P1-w /P2-w</b>  |                     | -        | 27.4/13.2            | -          | -       |              |

|            |                                 |      |      |      |             |       |
|------------|---------------------------------|------|------|------|-------------|-------|
| <b>b-w</b> | <b>R-w → TS1-w → Int1-w</b>     |      | 38.0 | 21.0 | 1,3-C,S-HT  | cE2PT |
|            | <b>Int1-w → Int2-w</b>          |      | -    | -7.5 | -           | -     |
|            | <b>Int2-w → TS2-w → Int4-w</b>  | 38.0 | 22.3 | -3.0 | 1,3-S,S-HT  | HAT   |
|            | <b>Int4-w → P3-w</b>            |      | -    | 24.3 | -           | -     |
| <b>c-w</b> | <b>R-w → TS1-w → Int1-w</b>     |      | 38.0 | 21.0 | 1,3-C,S-HT  | cE2PT |
|            | <b>Int1-w → Int2-w</b>          |      | -    | -7.5 | -           | -     |
|            | <b>Int2-w → TS3-w → Int5a-w</b> | 43.0 | 29.5 | 17.3 | 1,4-C,S-HT  | HAT   |
|            | <b>Int5a-w → P4-w</b>           |      | -    | 13.1 | -           | -     |
| <b>d-w</b> | <b>R-w → TS1-w → Int1-w</b>     |      | 38.0 | 21.0 | 1,3-C,S-HT  | cE2PT |
|            | <b>Int1-w → Int3-w</b>          |      | -    | 10.1 | -           | -     |
|            | <b>Int3-w → TS4-w → Int5b-w</b> | 47.4 | 16.3 | 0.9  | 1,1'-C,S-HT | HAT   |
|            | <b>Int5b-w → P4-w</b>           |      | -    | 11.9 | -           | -     |
| <b>e-w</b> | <b>R-w → TS5-w → Int6-w</b>     | 43.7 | 43.7 | 31.6 | 1,2-C,S-HT  | cE2PT |
|            | <b>Int6-w → P3-w</b>            |      | -    | 3.2  | -           | -     |

---

**Table S2** The calculated NPA charge- and Hirshfeld spin-population of key moieties at transition states of all the ten HTs. The labels of atoms can be seen in Fig. 1 and 2.

|                | TS1 (1,3-C,S-HT in R)  |                   |      |                     |                     | TS1-w (1,3-C,S-HT in R-w)  |                   |                   |                     |                     |        |                   |
|----------------|------------------------|-------------------|------|---------------------|---------------------|----------------------------|-------------------|-------------------|---------------------|---------------------|--------|-------------------|
|                | H5                     | -C1H <sub>2</sub> | S3   | S2                  | -C4H <sub>3</sub>   | H9                         | H10               | -C1H <sub>2</sub> | -OH11-              | S3                  | S2     | -C4H <sub>3</sub> |
| NPA charge     | 0.21                   | -0.05             | 0.50 | 0.27                | 0.06                | 0.54                       | 0.46              | -0.25             | -0.27               | 0.15                | 0.33   | 0.04              |
| Hirshfeld spin | 0.04                   | 0.56              | 0.31 | 0.07                | 0.03                | 0.06                       | 0.01              | 0.58              | 0.04                | 0.02                | 0.30   | 0.01              |
|                | TS2 (1,3-S,S-HT in R)  |                   |      |                     |                     | TS2-w (1,3-S,S-HT in R-w)  |                   |                   |                     |                     |        |                   |
|                | H5                     | S3                | S2   | -C1H <sub>2</sub> - | -C4H <sub>3</sub>   | H10                        | S3                | S2                | -C1H <sub>2</sub> - | -C4H <sub>3</sub>   | H9OH11 |                   |
| NPA charge     | 0.15                   | 0.65              | 0.26 | -0.15               | 0.08                | 0.18                       | 0.67              | 0.21              | -0.16               | 0.07                | 0.03   |                   |
| Hirshfeld spin | 0.01                   | 0.31              | 0.64 | 0.02                | 0.02                | 0.01                       | 0.35              | 0.59              | 0.02                | 0.03                | 0.00   |                   |
|                | TS3 (1,4-C,S-HT in R)  |                   |      |                     |                     | TS3-w (1,4-C,S-HT in R-w)  |                   |                   |                     |                     |        |                   |
|                | H6                     | -C4H <sub>2</sub> | S2   | -S3H5-              | -C1H <sub>2</sub> - | H6                         | -C4H <sub>2</sub> | S2                | -S3H10-             | -C1H <sub>2</sub> - | H9OH11 |                   |
| NPA charge     | 0.13                   | -0.01             | 0.18 | 0.84                | -0.14               | 0.13                       | -0.02             | 0.13              | 0.83                | -0.15               | 0.08   |                   |
| Hirshfeld spin | 0.02                   | 0.56              | 0.31 | 0.05                | 0.05                | 0.02                       | 0.56              | 0.31              | 0.06                | 0.05                | 0.00   |                   |
|                | TS4 (1,1'-C,S-HT in R) |                   |      |                     |                     | TS4-w (1,1'-C,S-HT in R-w) |                   |                   |                     |                     |        |                   |
|                | H7                     | -C4H <sub>2</sub> | S2   | -S3H5               | -C1H <sub>2</sub>   | H7                         | -C4H <sub>2</sub> | S2                | -S3H10              | -C1H <sub>2</sub>   | H9OH11 |                   |
| NPA charge     | 0.16                   | -0.13             | 0.44 | 0.39                | 0.13                | 0.16                       | -0.13             | 0.41              | 0.43                | 0.12                | 0.03   |                   |
| Hirshfeld spin | 0.04                   | 0.49              | 0.10 | 0.20                | 0.18                | 0.04                       | 0.45              | 0.14              | 0.19                | 0.19                | 0.00   |                   |
|                | TS5 (1,2-C,S-HT in R)  |                   |      |                     |                     | TS5-w (1,2-C,S-HT in R-w)  |                   |                   |                     |                     |        |                   |
|                | H8                     | -C1H <sub>2</sub> | S2   | S3                  | -C4H <sub>3</sub>   | H9                         | H11               | -C1H <sub>2</sub> | -OH10-              | S2                  | S3     | -C4H <sub>3</sub> |
| NPA charge     | 0.28                   | 0.03              | 0.43 | 0.23                | 0.04                | 0.55                       | 0.53              | -0.19             | -0.21               | 0.19                | 0.12   | 0.01              |
| Hirshfeld spin | 0.01                   | 0.68              | 0.24 | 0.07                | 0.00                | 0.05                       | 0.02              | 0.67              | 0.04                | 0.21                | 0.01   | 0.01              |

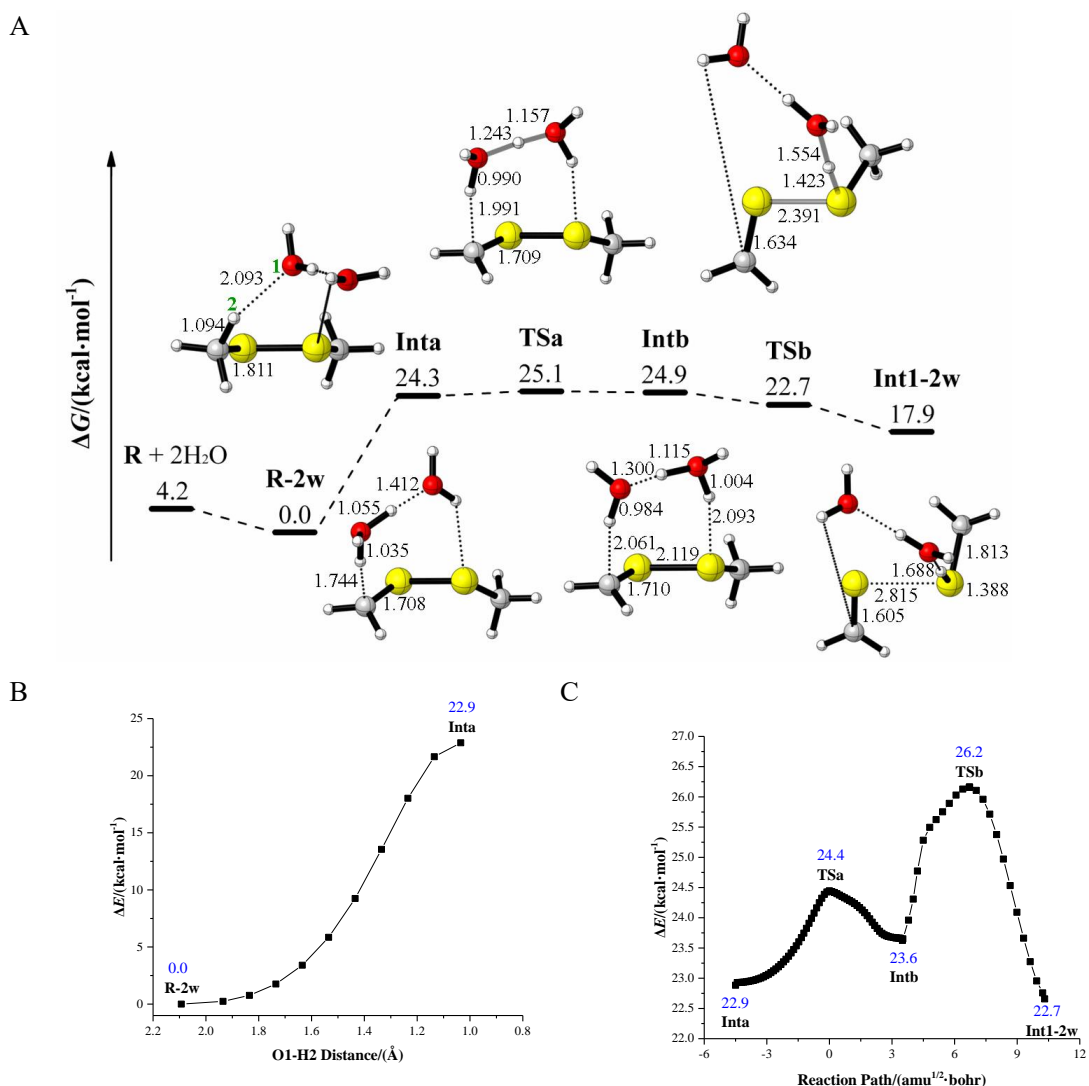

**Fig. S1** A) Relative  $\Delta G$  plot for the rate-determining step in pathway **b-w**, *i.e.* from **R-w** to **Int1-w** in Fig. 2, with the addition of a second water molecule. And key geometric parameters for each optimized stationary point in the gas phase computed at the  $U\omega B97X-D/6-311+G^{**}$  level. Here, red, yellow, gray, and white balls represent oxygen, sulfur, carbon, and hydrogen atoms, respectively. The key atoms are labelled in dark green. The unit of bond distance is angstrom ( $\text{\AA}$ ). B) Flexible scanning profile for a barrierless sub-step from **R-2w** to **Inta**, and C) intrinsic reaction coordinate (IRC) profile for sub-steps from **Inta** to **Int1-2w**, and relative energies ( $\Delta E$ ) for the stationary points

A 1,3-C,S-HT in R

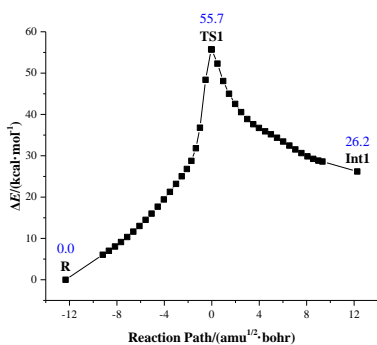

B 1,3-C,S-HT in R-w

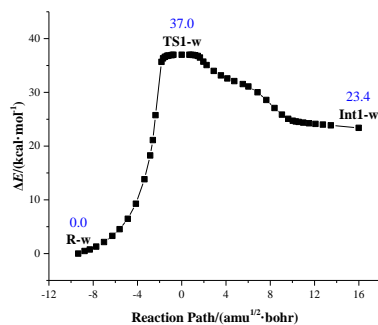

C 1,3-S,S-HT in R

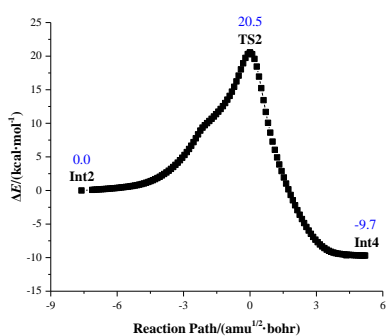

D 1,3-S,S-HT in R-w

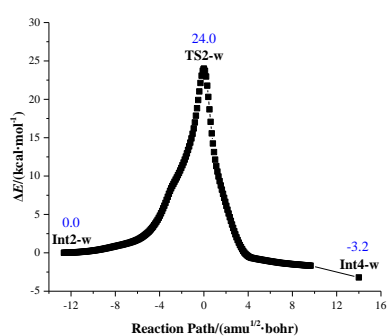

E 1,4-C,S-HT in R

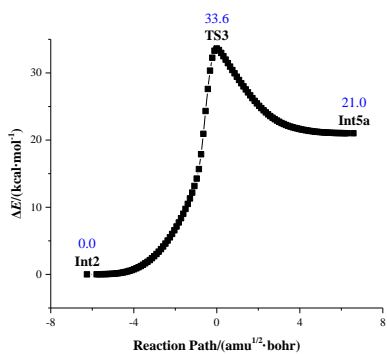

F 1,4-C,S-HT in R-w

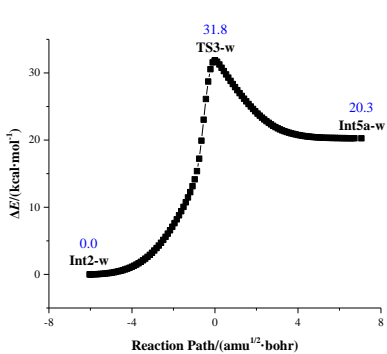

G 1,1'-C,S-HT in R

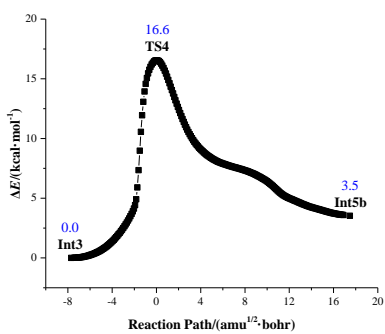

H 1,1'-C,S-HT in R-w

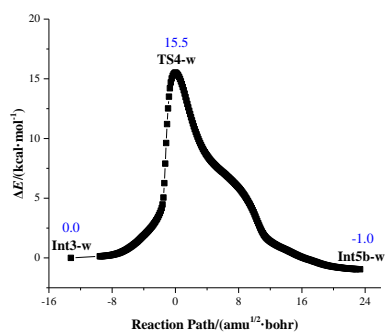

I 1,2-C,S-HT in **R**

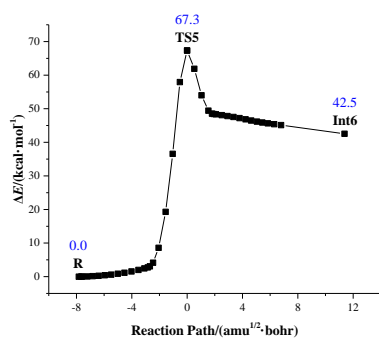

J 1,2-C,S-HT in **R-w**

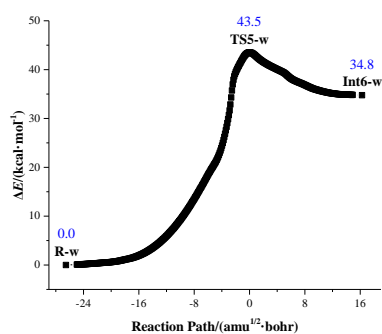

**Fig. S2** In the gas phase, the predicted intrinsic reaction coordinate (IRC) profiles for five HTs in (A, C, E, G, I) **R** and (B, D, F, H, J) **R-w**, and relative energies ( $\Delta E$  in kcal·mol<sup>-1</sup>) for the stationary points at the U $\omega$ B97X-D/6-311+G\*\* level

A 1,4-C,S-HT in R

Coordinate

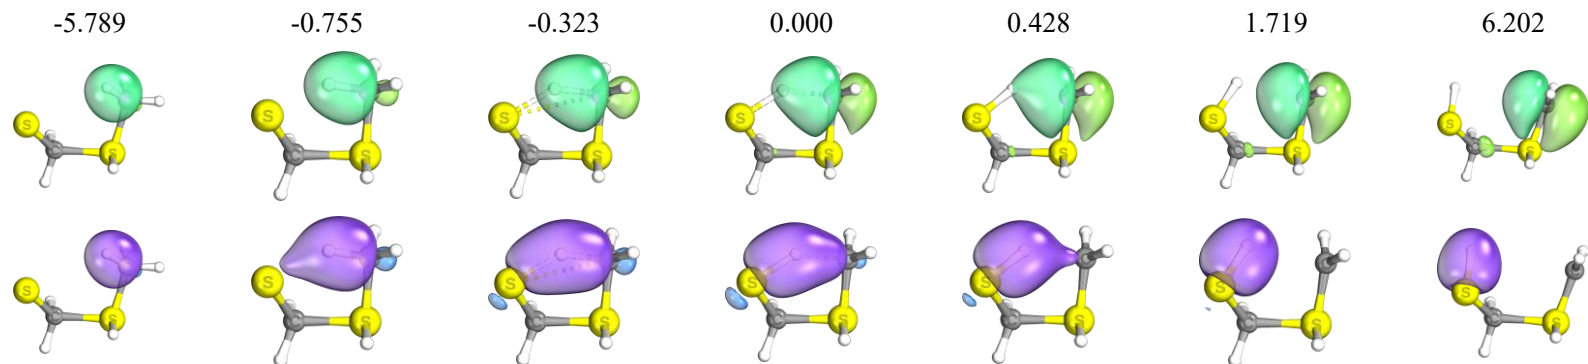

B 1,1'-C,S-HT in R

Coordinate

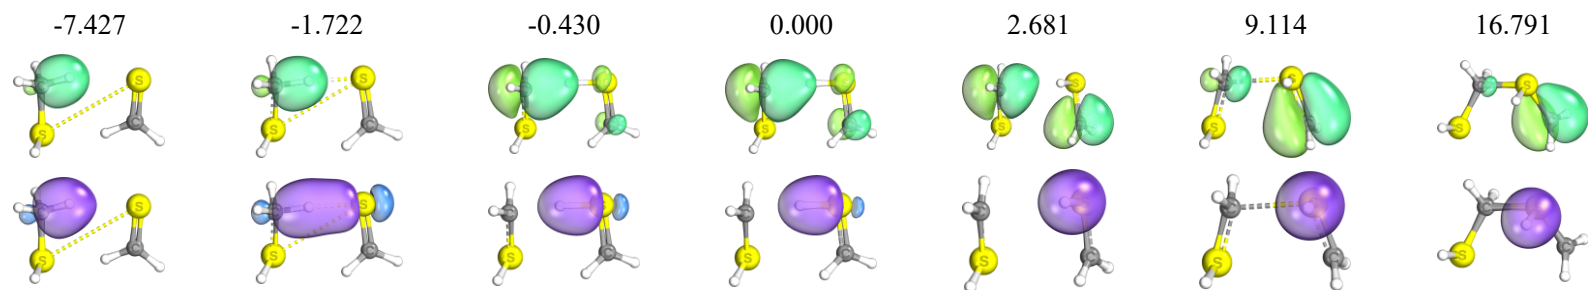

C 1,3-S,S-HT in R-w

Coordinate

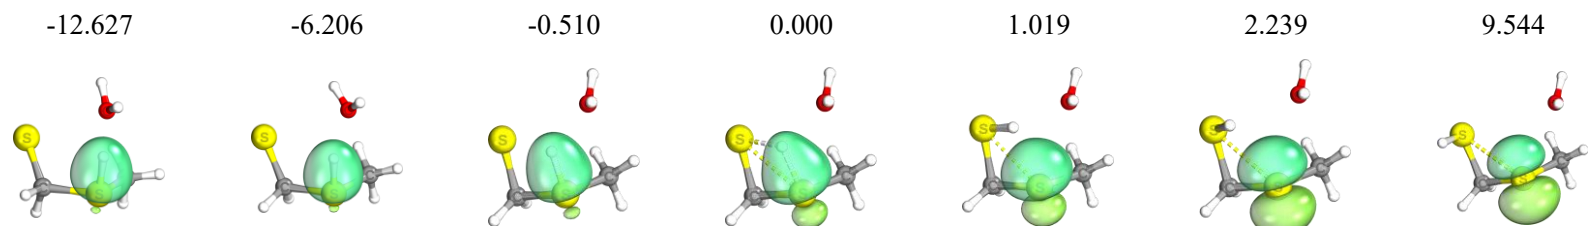



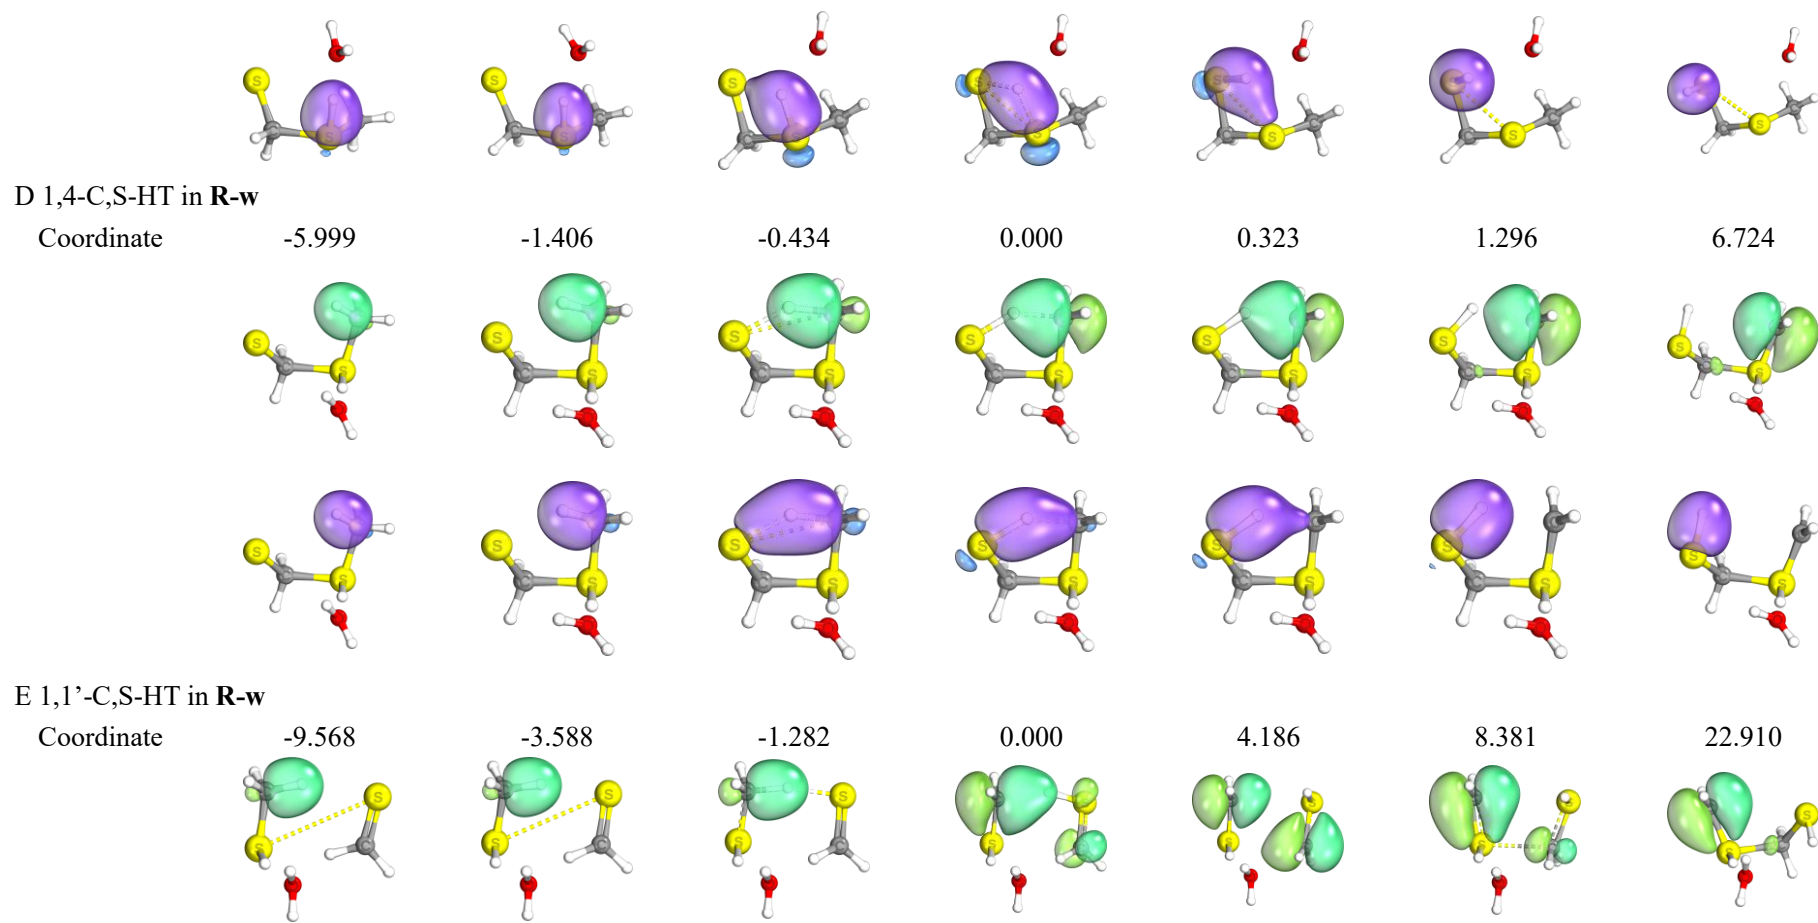

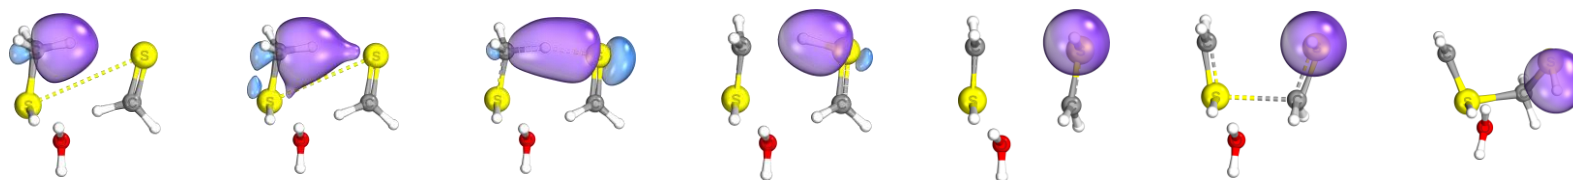

**Fig. S3** The intrinsic bond orbital (IBO) transformations of the broken C-H bond along the intrinsic reaction coordinate (IRC) of 1,4-C,S- and 1,1'-C,S-HT in (A, B) **R** and (D, E) **R-w**. And the IBO transformation of the broken S-H bond along the IRC of 1,3-S,S-HT in (C) **R-w**. Here, the  $\alpha$ - and  $\beta$ -IBOs are shown in green and purple, respectively. The unit of coordinate is  $\text{amu}^{1/2}\cdot\text{bohr}$ .

A 1,3-C,S-HT in **R**

Coordinate

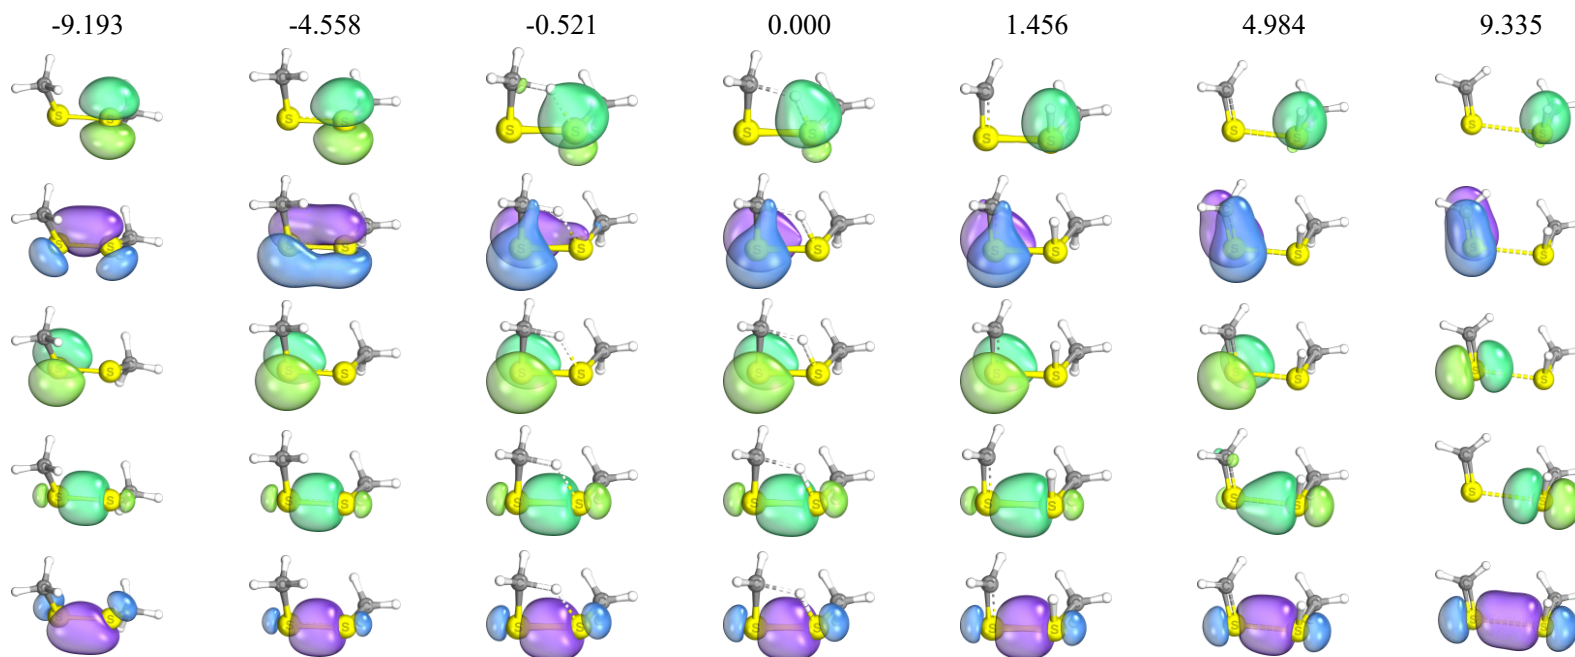

B 1,3-C,S-HT in R-w

Coordinate

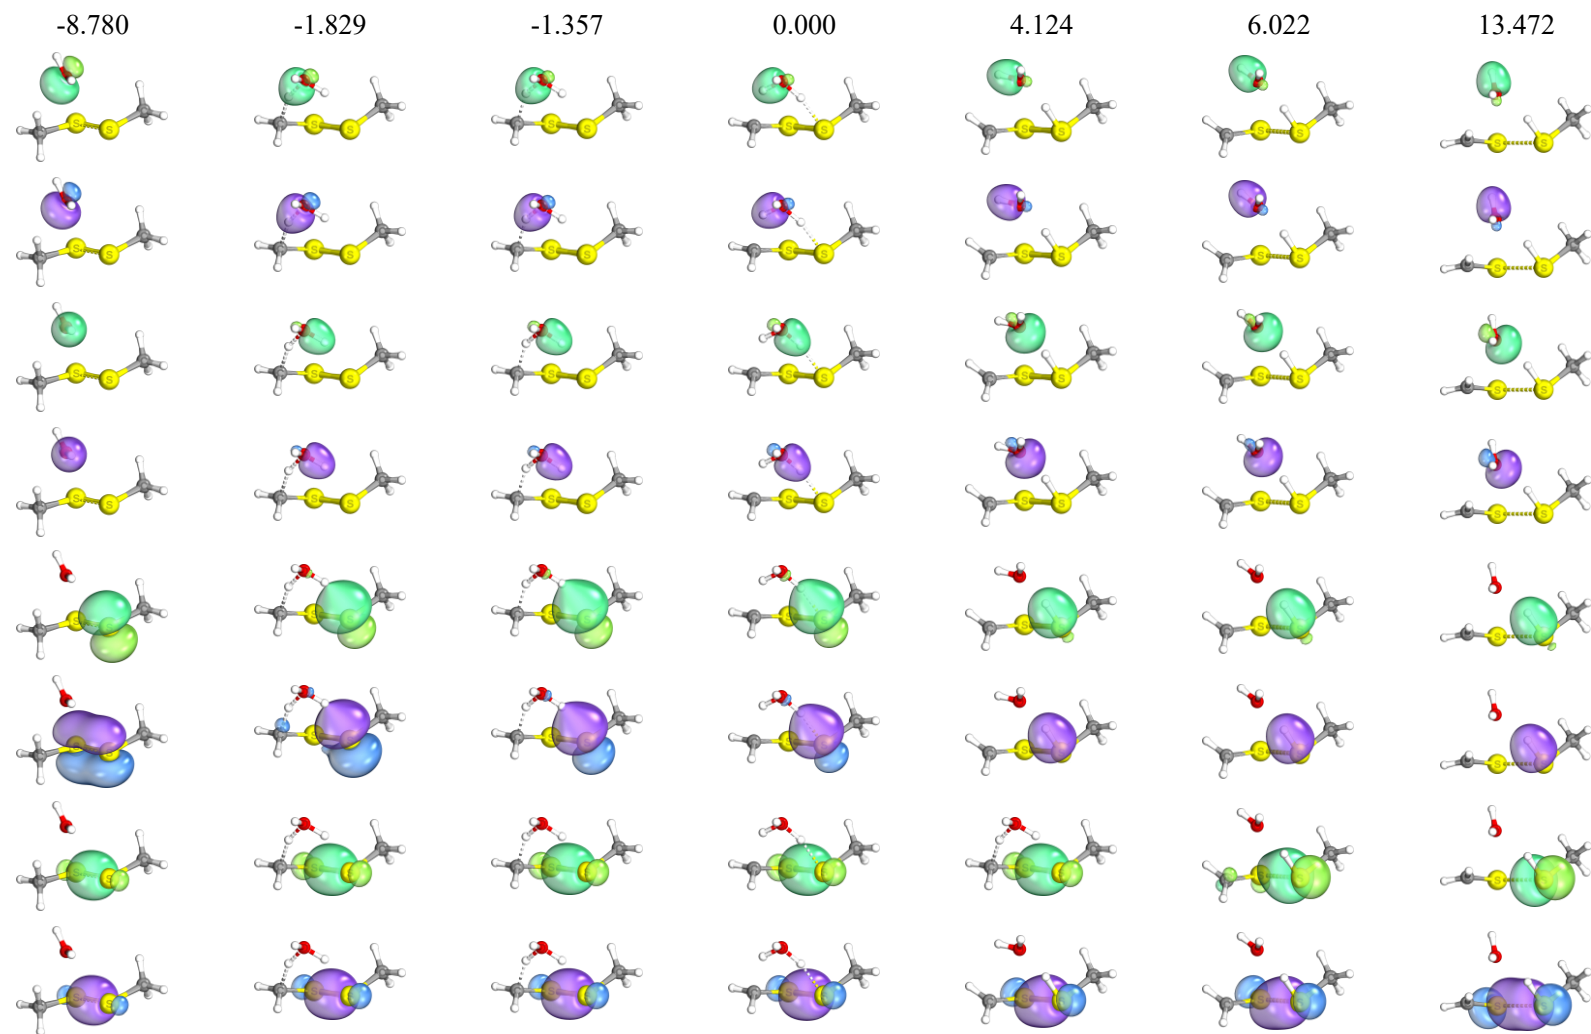

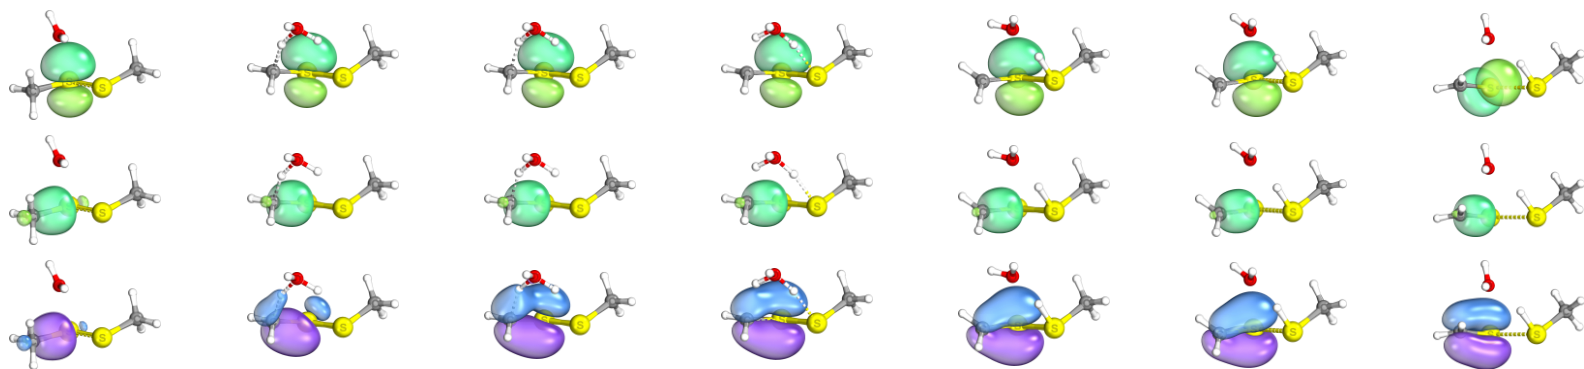

C 1,3-S,S-HT in **R**

Coordinate

-7.126

-1.631

-0.408

0.000

0.714

1.939

5.204

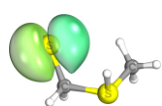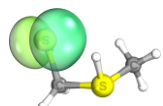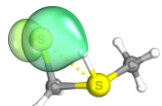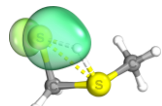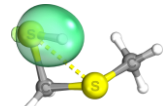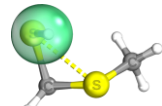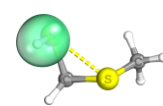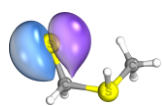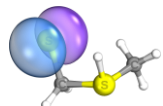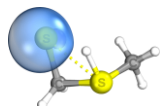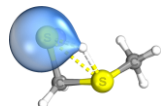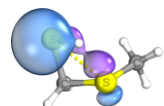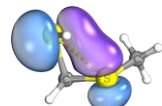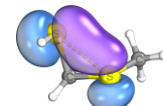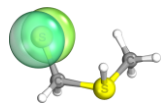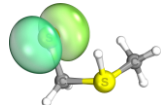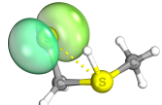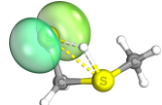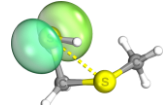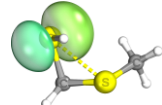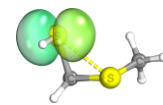

D 1,3-S,S-HT in **R-w**

Coordinate

-12.627

-6.206

-0.510

0.000

1.019

2.239

9.544

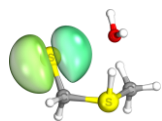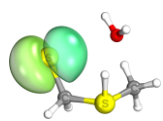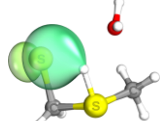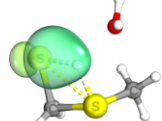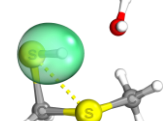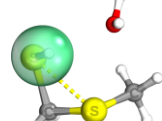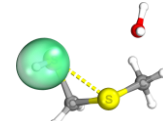

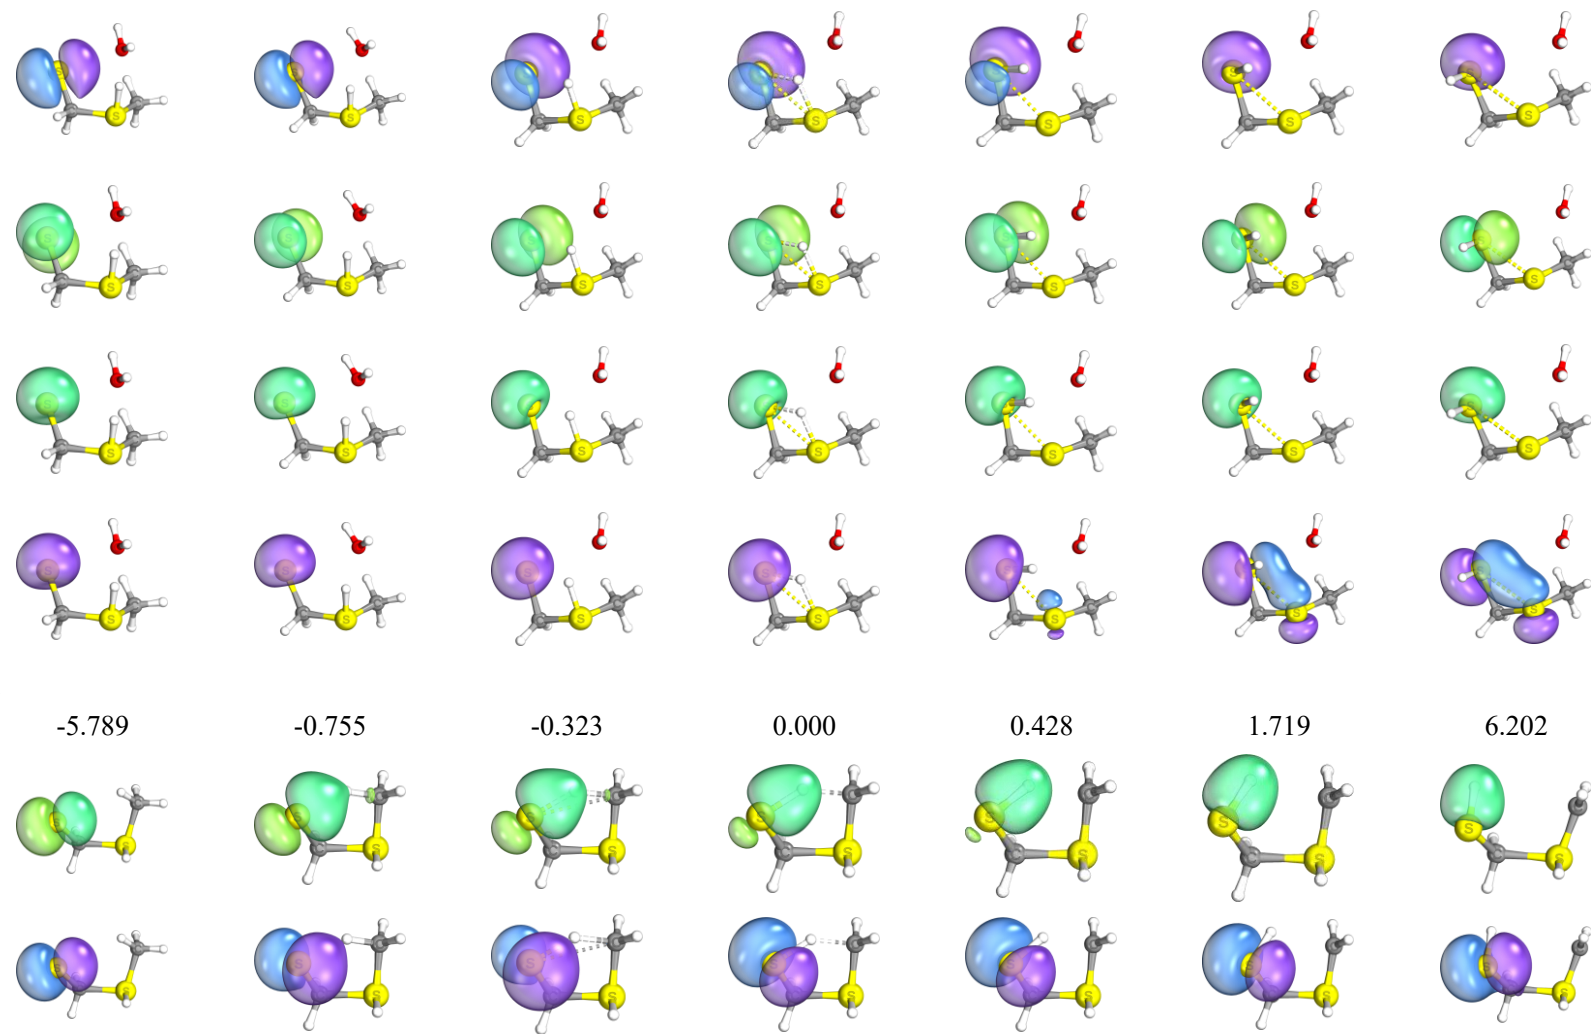

F 1,4-C,S-HT in R-w

Coordinate

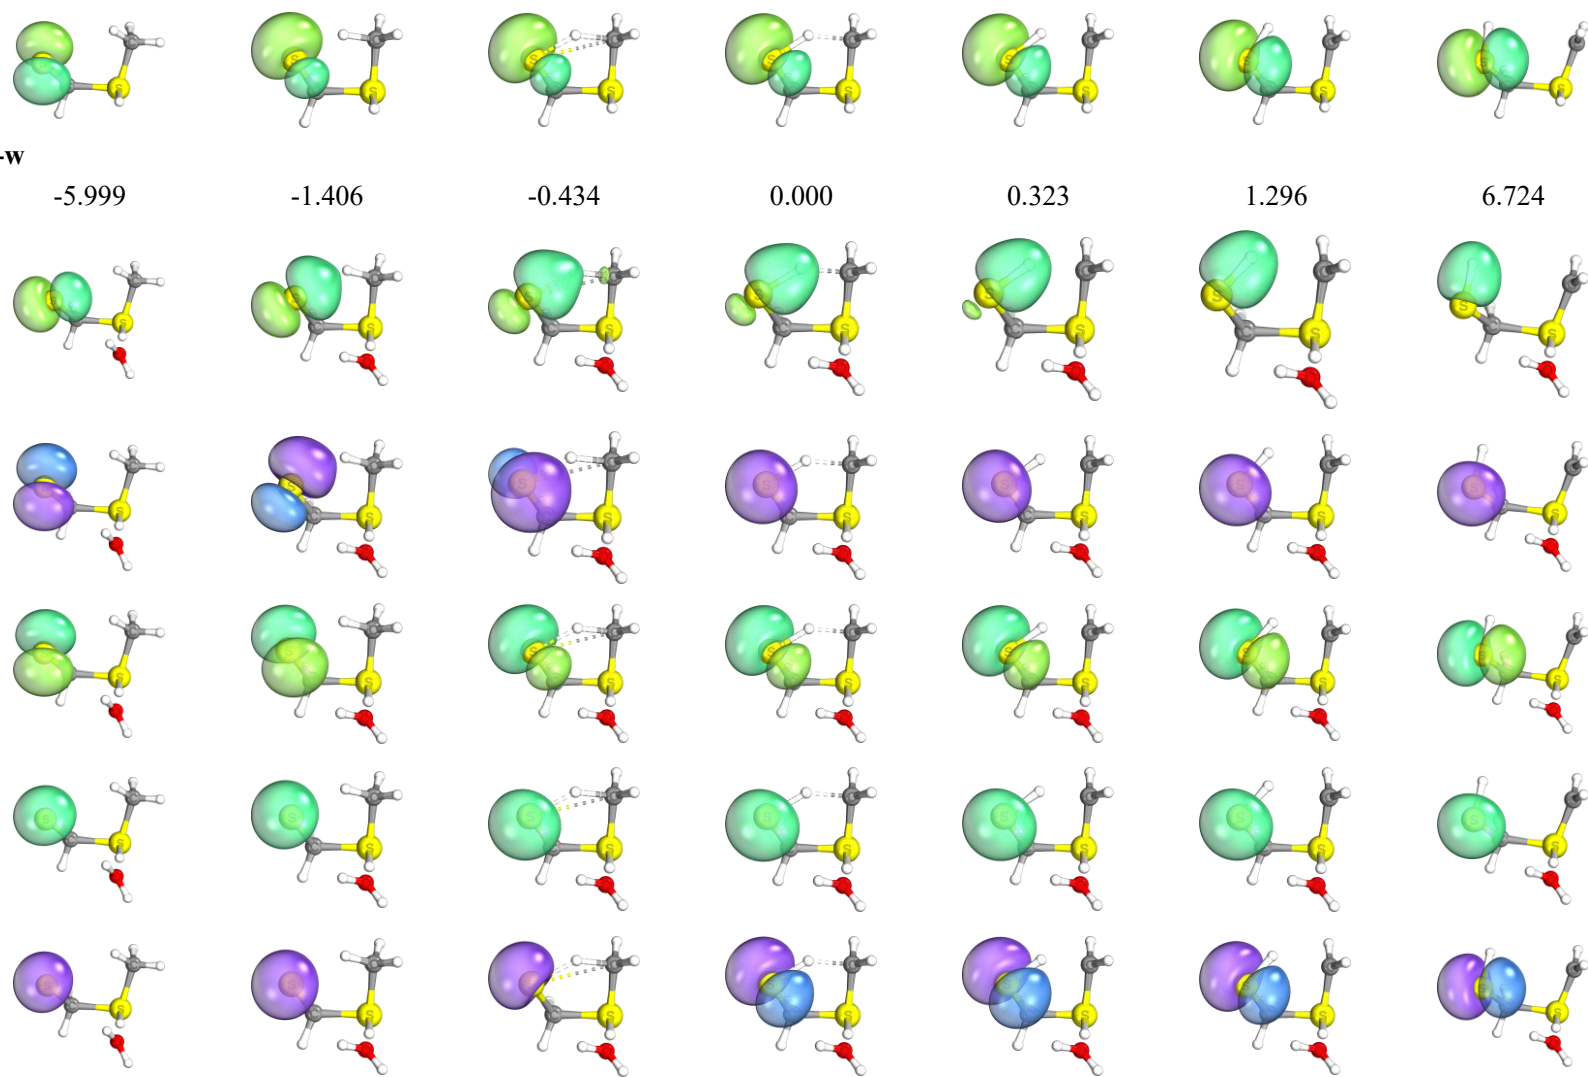

G 1,1'-C,S-HT in R

Coordinate

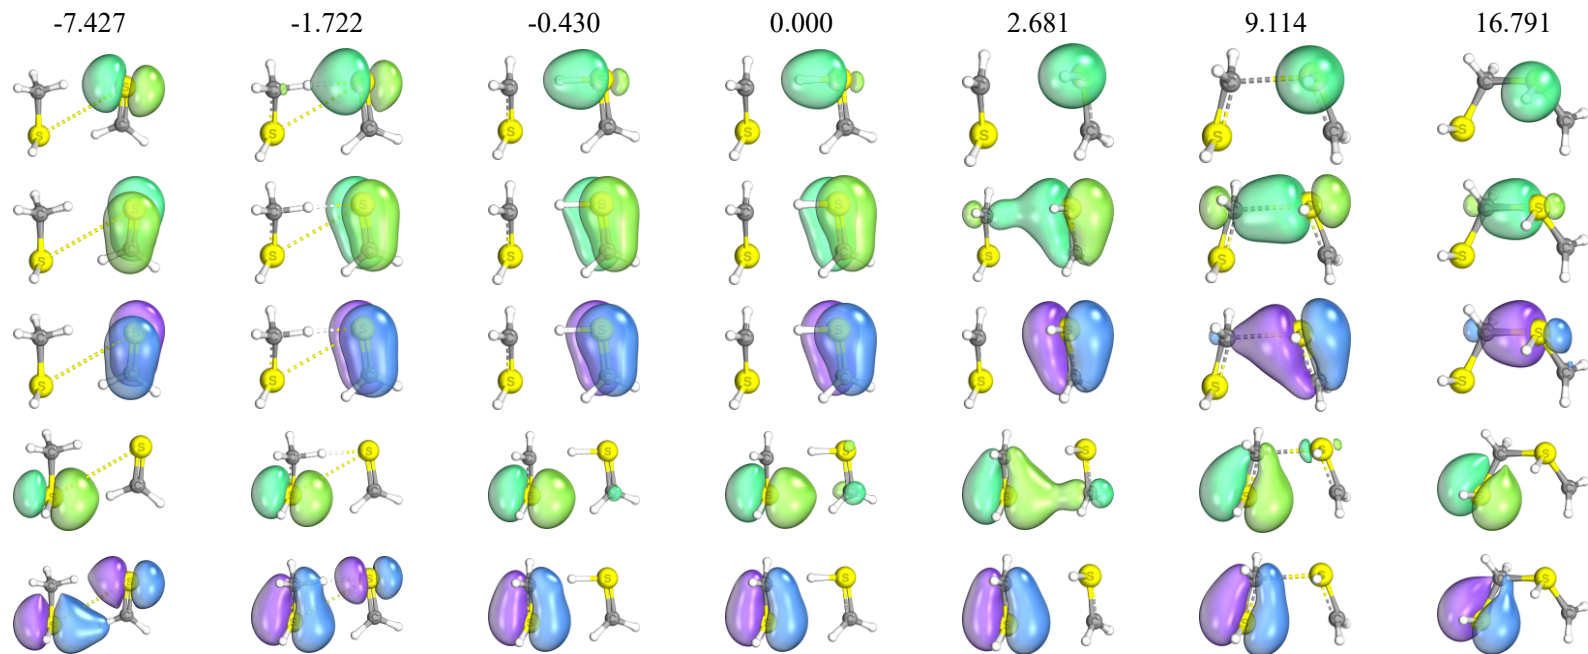

H 1,1'-C,S-HT in R-w

Coordinate

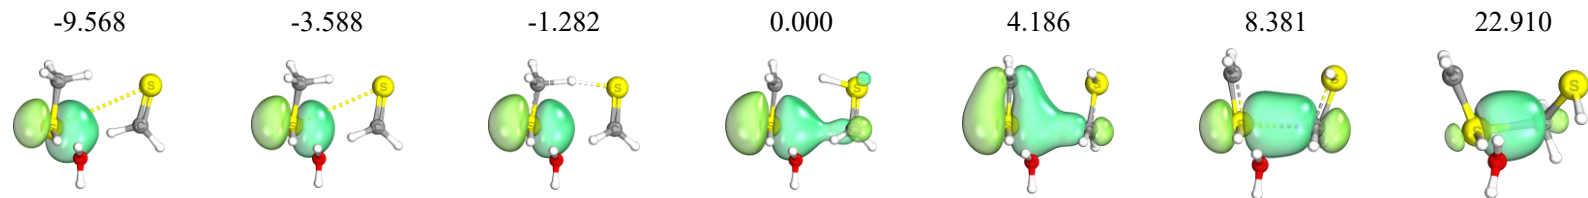

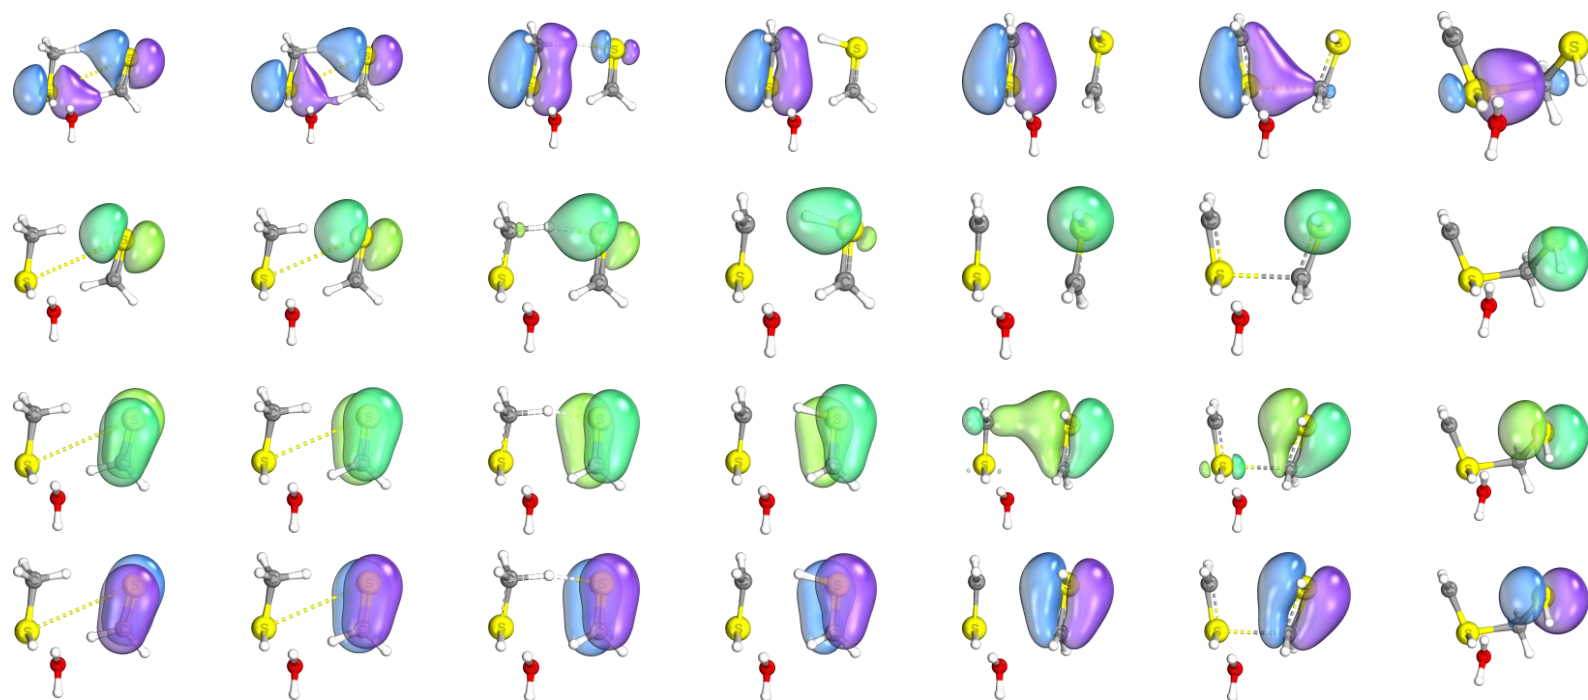

I 1,2-C,S-HT in R

Coordinate

-7.828

-6.822

-1.043

0.000

1.043

2.920

6.794

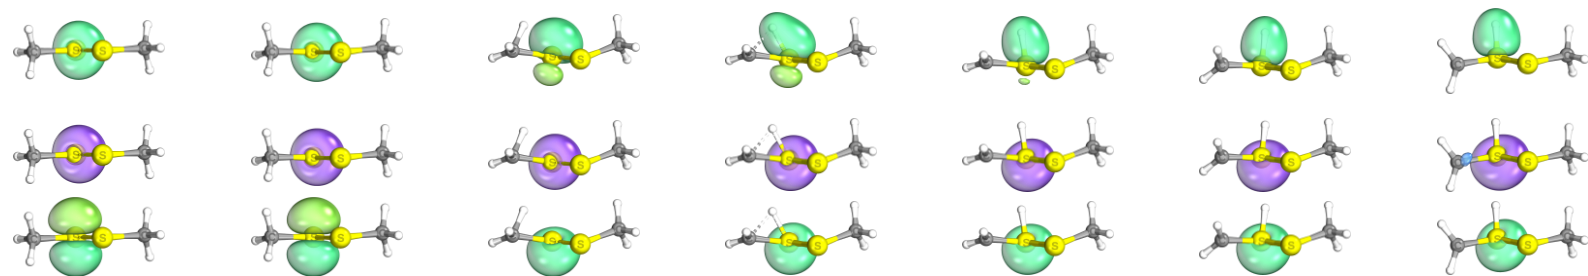



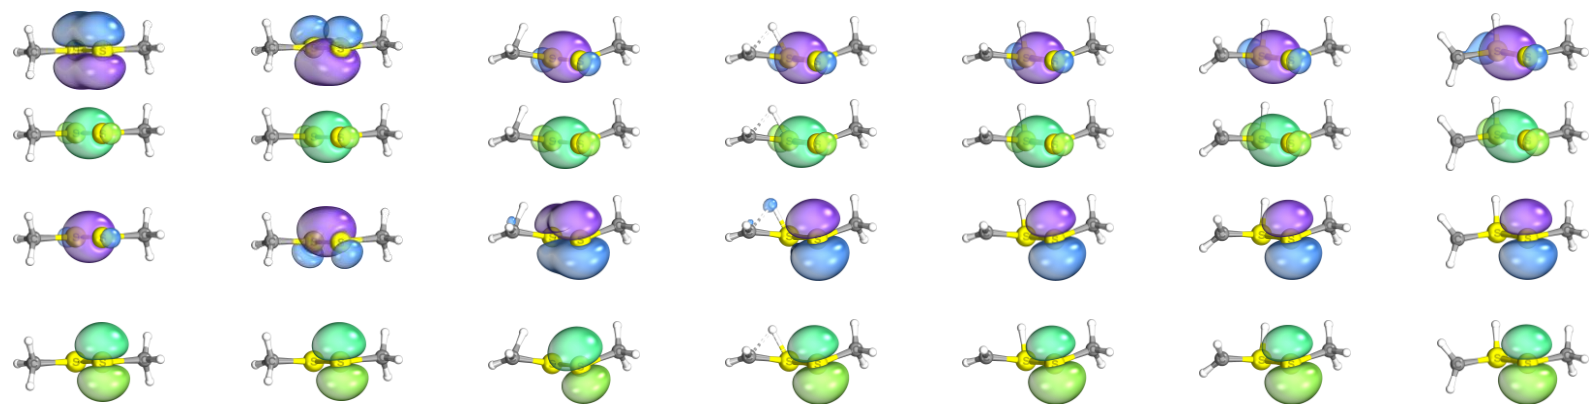

J 1,2-C,S-HT in R-w

Coordinate

-24.965

-6.291

-2.542

0.000

1.212

5.184

14.911

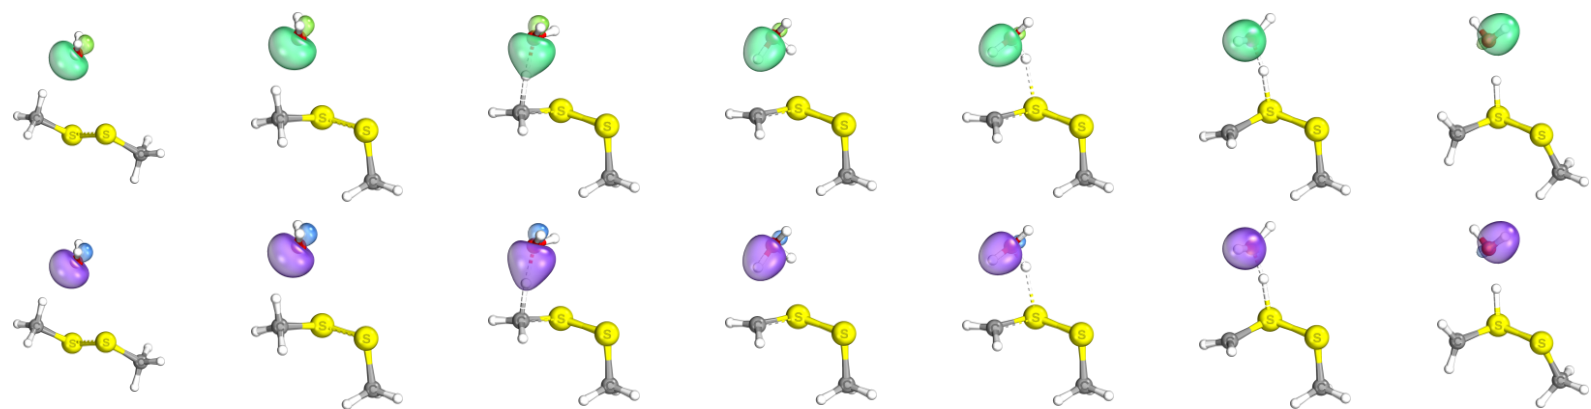

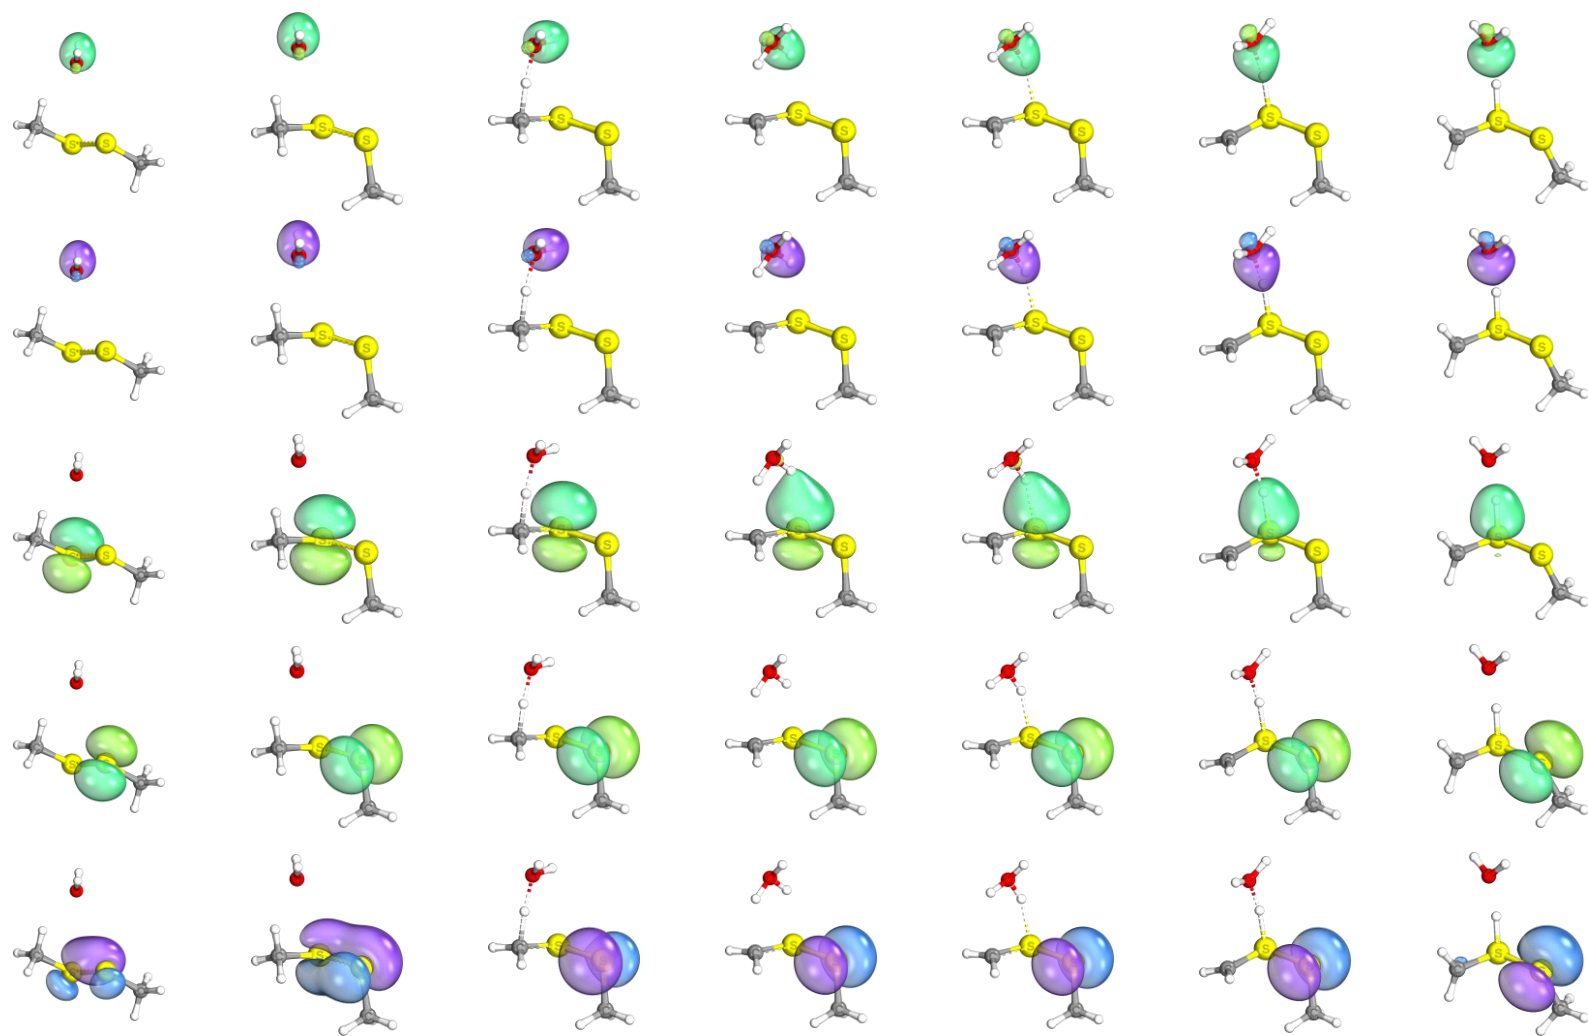

**Fig. S4** The intrinsic bond orbital (IBO) transformations of the key bonds along the intrinsic reaction coordinate (IRC) of five HTs in (A, C, E, G, I) **R** and (B, D, F, H,

J) R-w. Here, the  $\alpha$ - and  $\beta$ -IBOs are shown in green and purple, respectively. The unit of coordinate is  $\text{amu}^{1/2} \cdot \text{bohr}$ .

A 1,3-C,S-HT in R

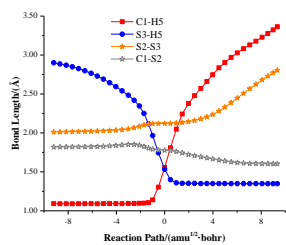

C 1,3-S,S-HT in R

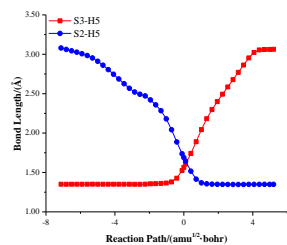

E 1,4-C,S-HT in R

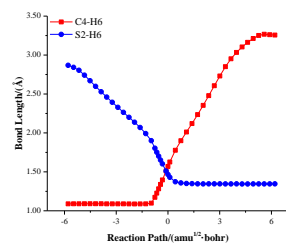

G 1,1'-C,S-HT in R

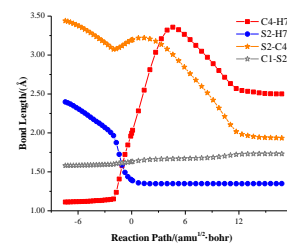

I 1,2-C,S-HT in R

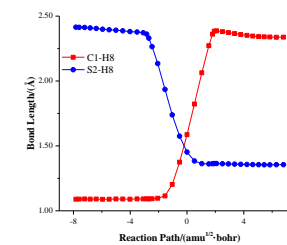

B 1,3-C,S-HT in R-w

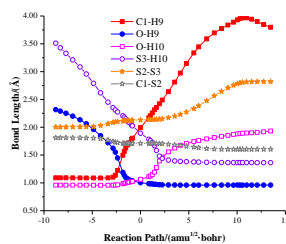

D 1,3-S,S-HT in R-w

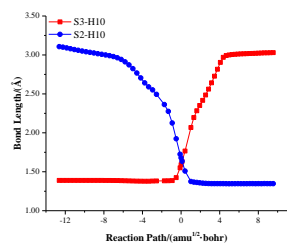

F 1,4-C,S-HT in R-w

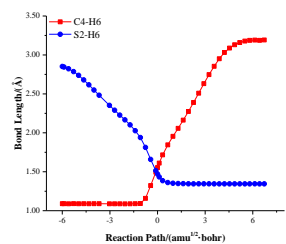

H 1,1'-C,S-HT in R-w

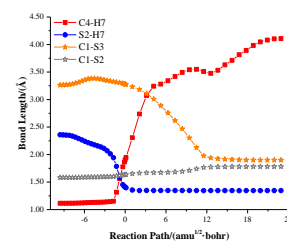

J 1,2-C,S-HT in R-w

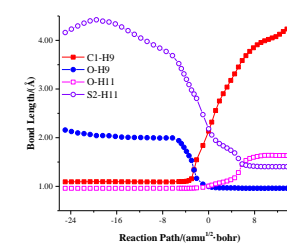

**Fig. S5** The variations of key bond lengths along the intrinsic reaction coordinate (IRC) of five HTs in (A, C, E, G, I) R and (B, D, F, H, J) R-w. The labels of atoms can be seen in Fig. 1 and 2.

A 1,3-C,S-HT in R

Coordinate

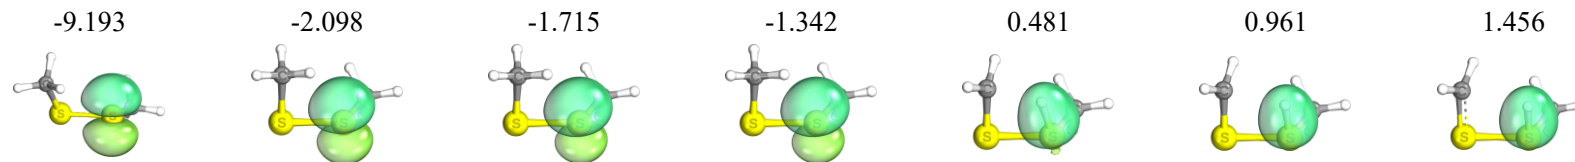

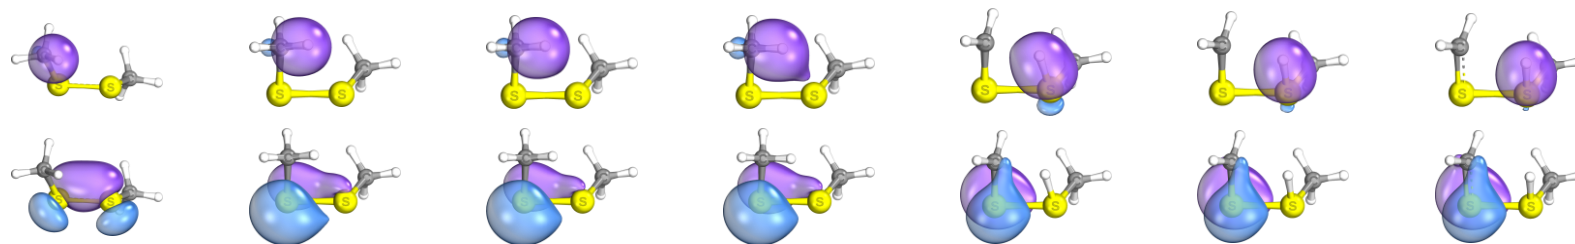

**B 1,3-C,S-HT in R-w**

Coordinate

-8.780

-2.373

-1.829

-1.682

2.250

2.890

3.537

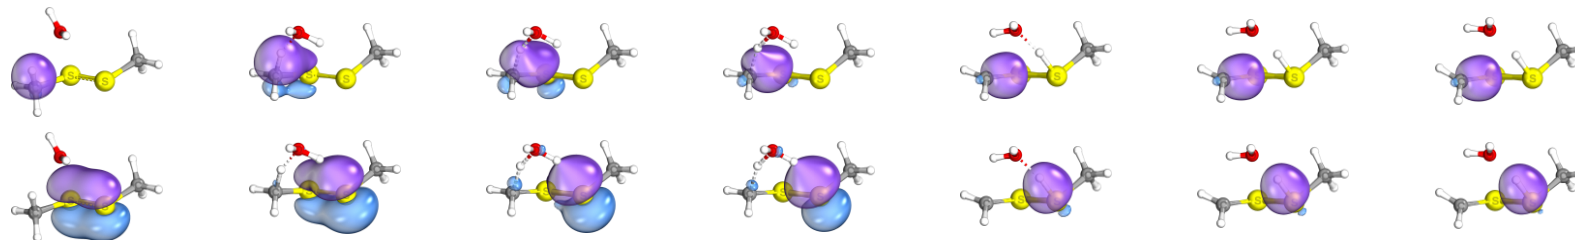

**C 1,3-S,S-HT in R**

Coordinate

-7.126

0.102

0.408

1.020

1.326

1.633

5.204

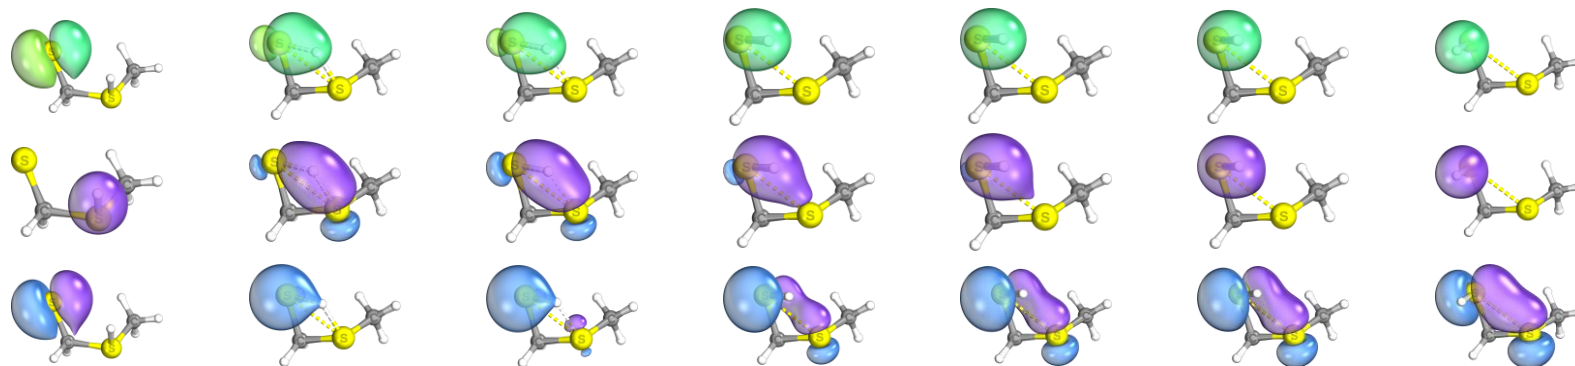

**D 1,3-S,S-HT in R-w**

Coordinate

-12.627

0.102

0.408

1.019

1.324

1.629

9.544

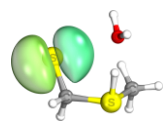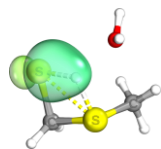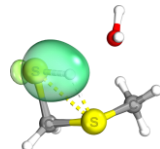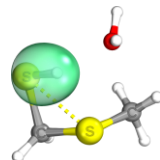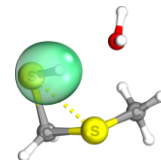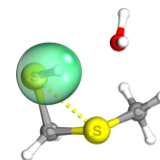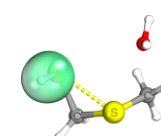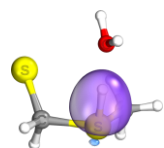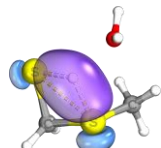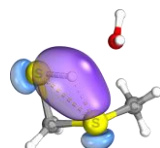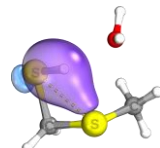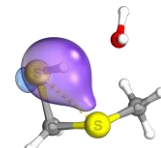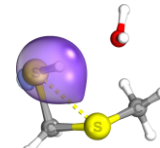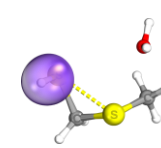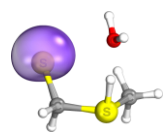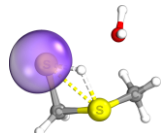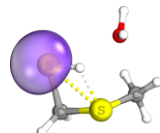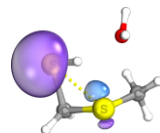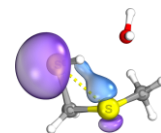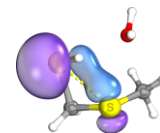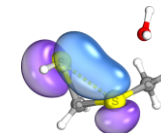

E 1,1'-C,S-HT in R

Coordinate

-7.427

-1.076

-0.430

2.040

6.535

8.469

12.980

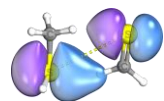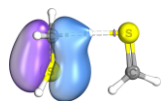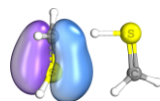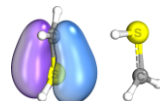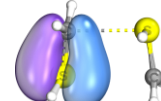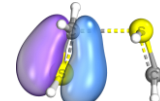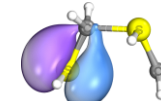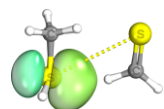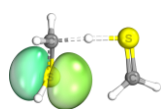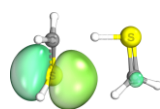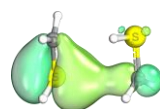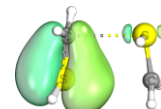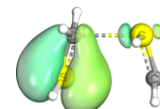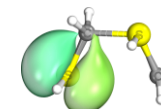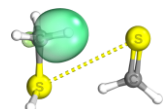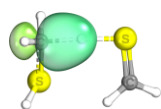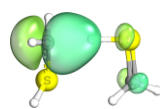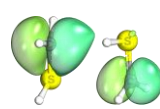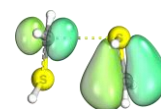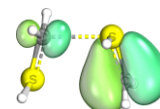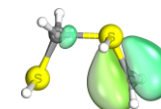

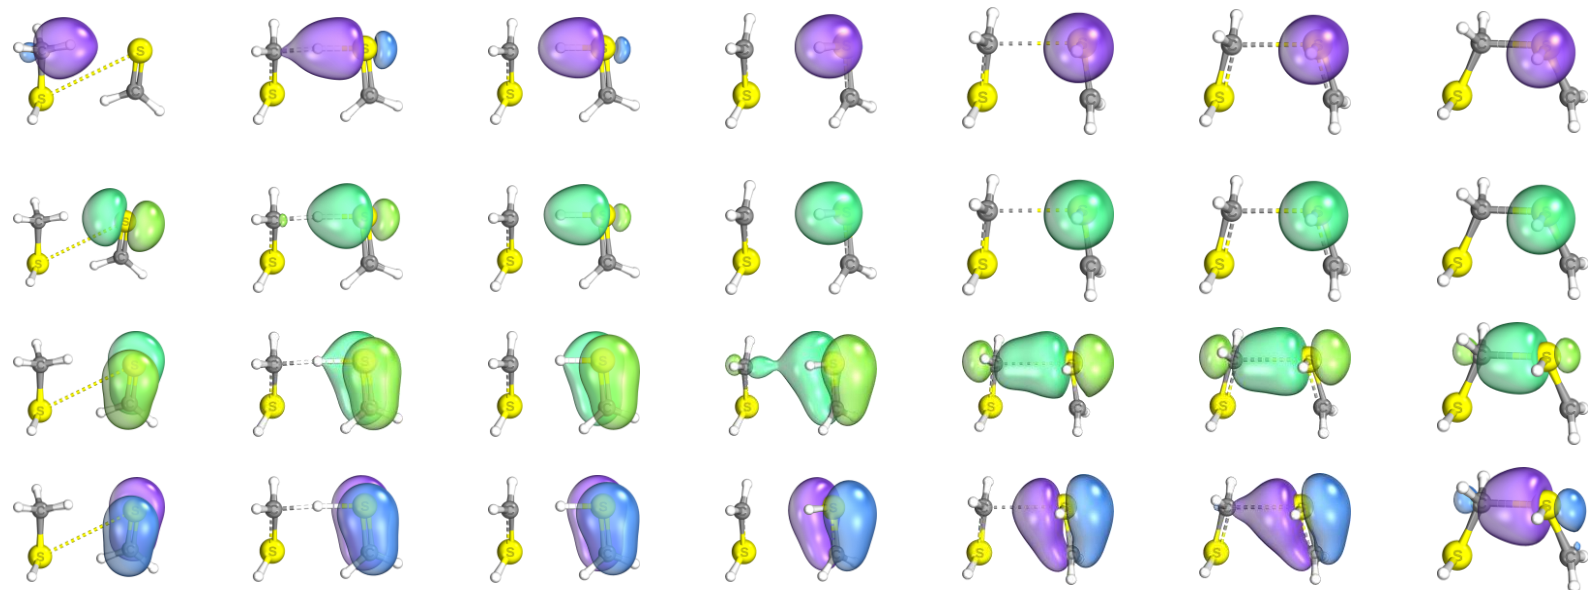

F 1,1'-C,S-HT in R-w

Coordinate

-9.568

-1.282

-0.348

2.098

6.282

8.381

12.581

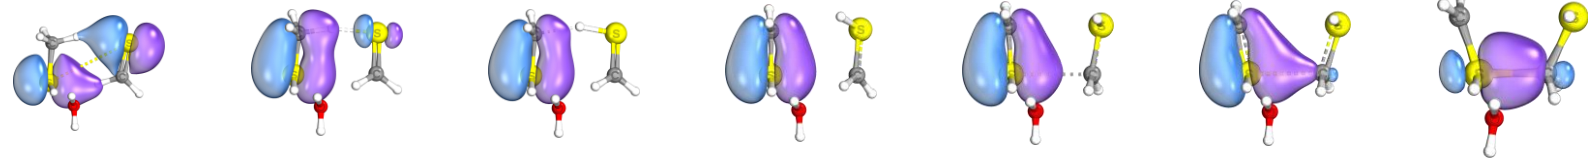

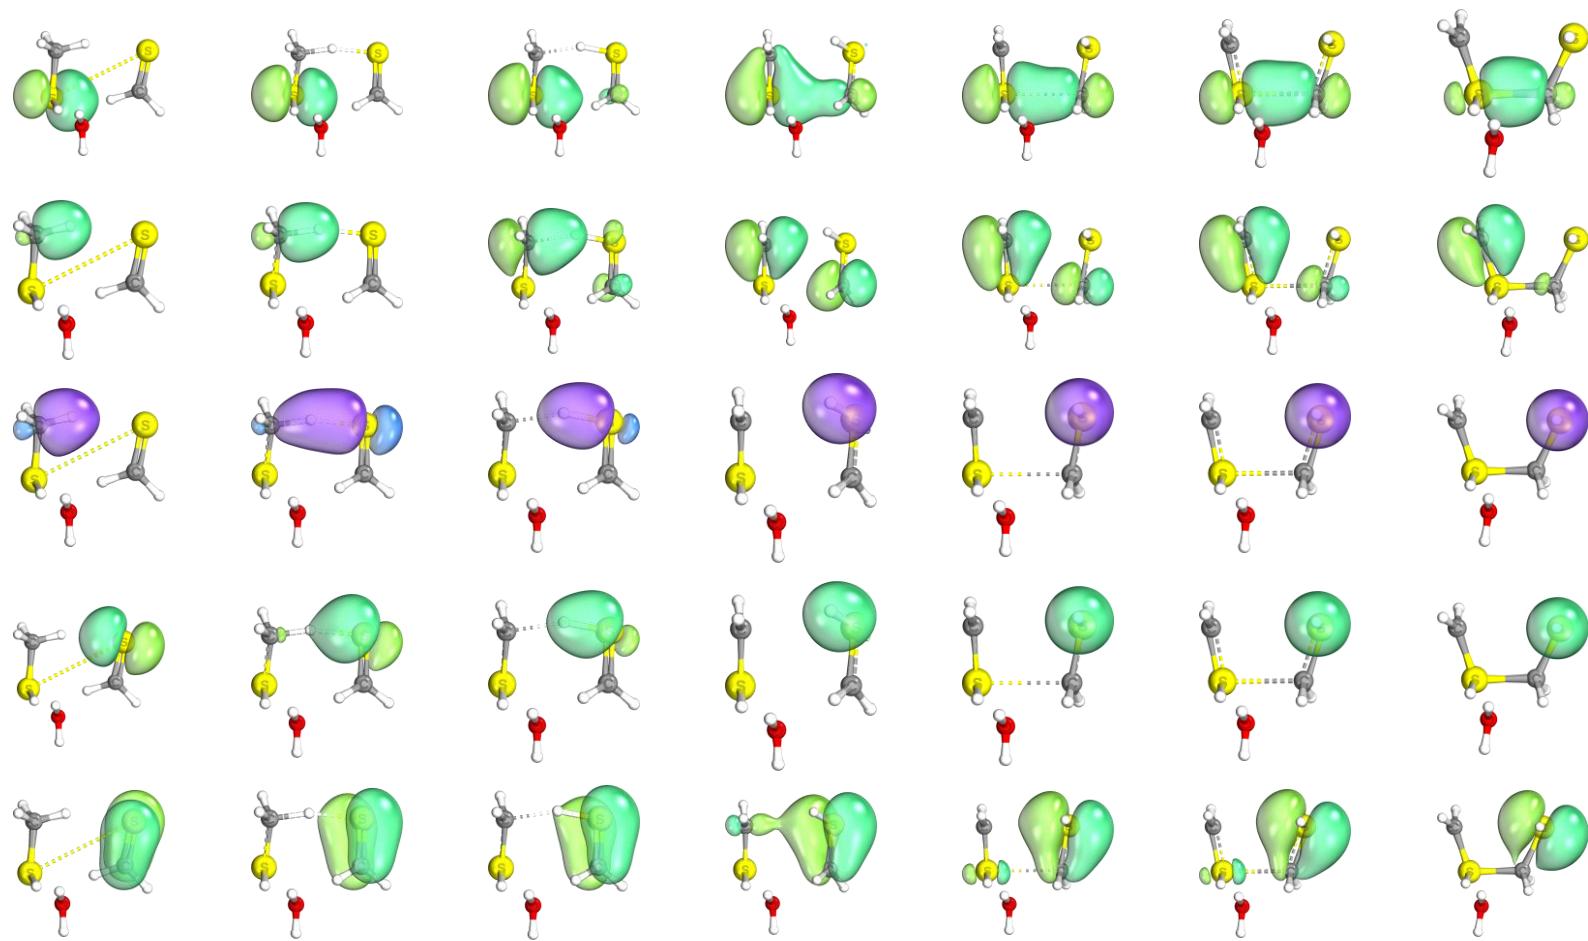

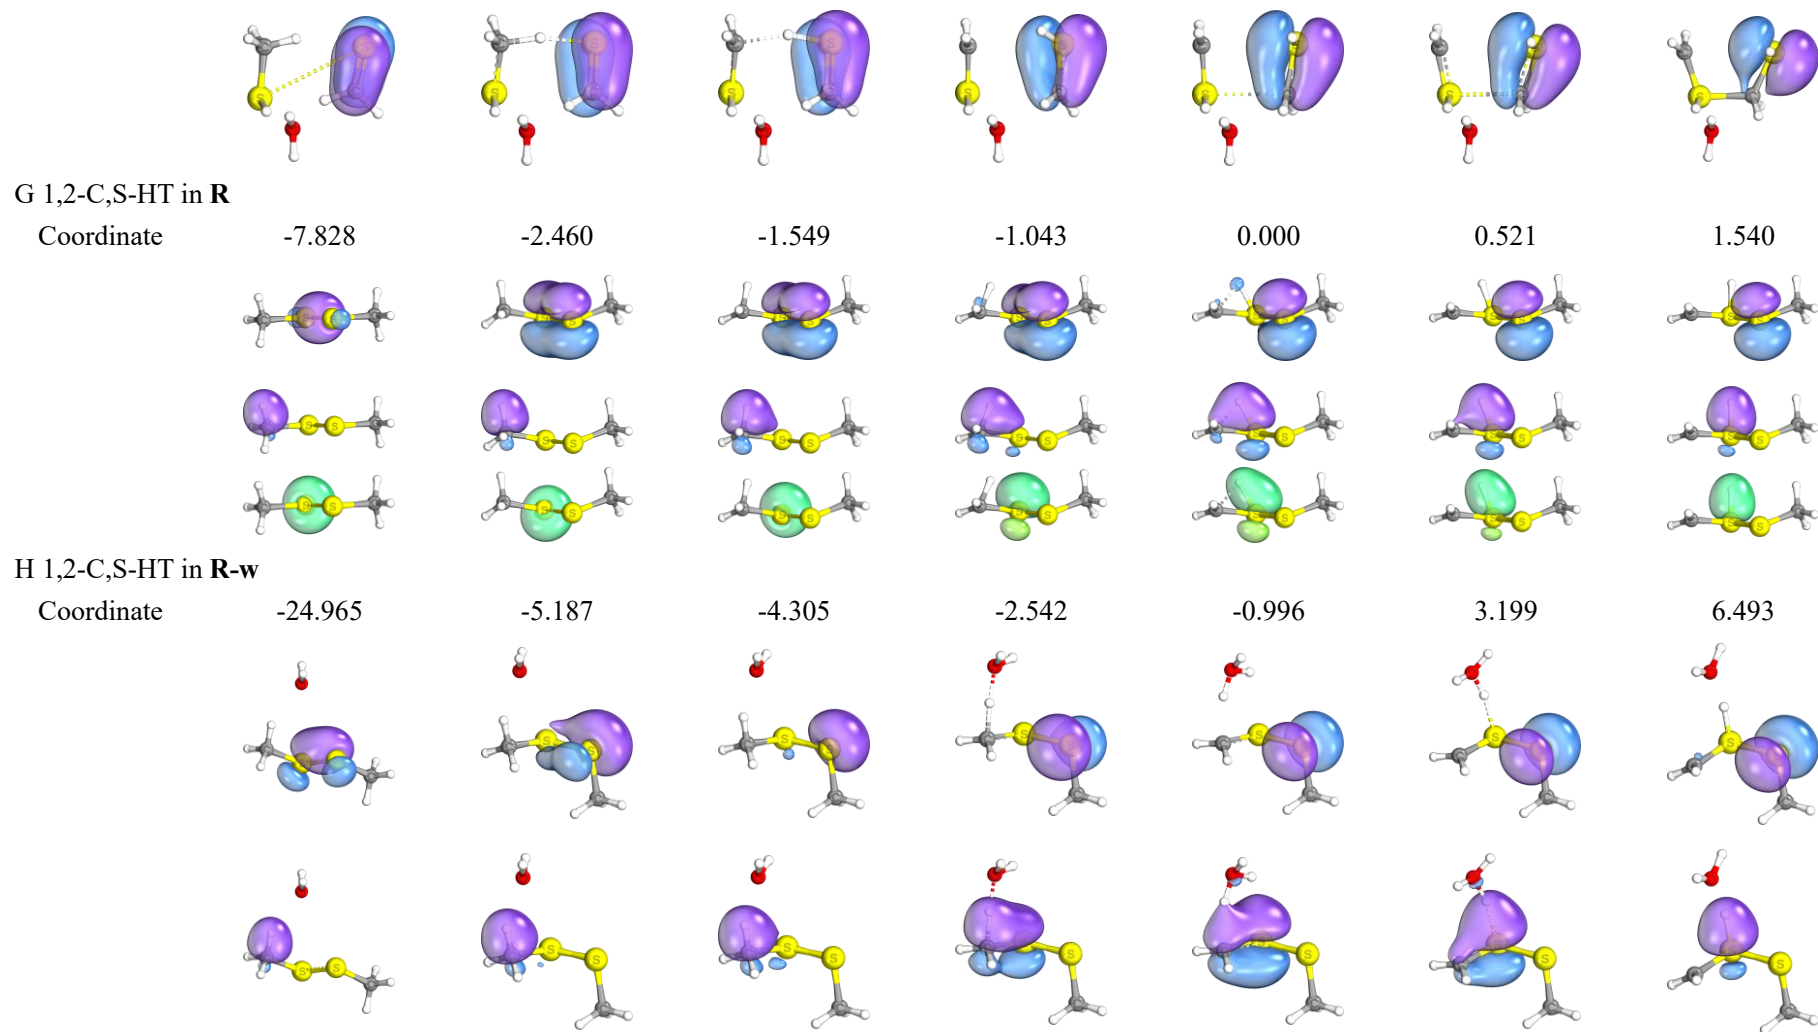

**Fig. S6** The intrinsic bond orbital (IBO) transformations of the key bonds along the intrinsic reaction coordinate (IRC) of four HTs in (A, C, E, G) R and (B, D, F, H)



**R-w.** Here, the  $\alpha$ - and  $\beta$ -IBOs are shown in green and purple, respectively. The unit of coordinate is  $\text{amu}^{1/2}\cdot\text{bohr}$ .

The Cartesian coordinate (in Å) and Gibbs free energy (in a.u.) of each optimized stationary point

|              |             |           |           |              |             |           |           |
|--------------|-------------|-----------|-----------|--------------|-------------|-----------|-----------|
| <b>R</b>     |             |           |           | <b>Int1</b>  |             |           |           |
|              | -875.872009 |           |           |              | -875.835167 |           |           |
| S            | 0.727607    | 0.690874  | -0.000116 | S            | -1.160051   | -0.690178 | -0.161983 |
| C            | 2.208071    | -0.358279 | 0.000203  | C            | -2.173498   | 0.704442  | 0.409328  |
| H            | 2.233197    | -0.970825 | -0.900924 | H            | -1.862627   | 1.633132  | -0.066104 |
| H            | 3.044689    | 0.340982  | -0.000062 | H            | -3.216175   | 0.490303  | 0.175030  |
| H            | 2.233241    | -0.970279 | 0.901693  | H            | -2.047138   | 0.767475  | 1.488590  |
| S            | -0.727597   | -0.690834 | -0.000129 | S            | 1.362794    | 0.608313  | -0.255405 |
| C            | -2.208088   | 0.358215  | 0.000191  | C            | 2.206968    | -0.558680 | 0.452143  |
| H            | -2.232793   | 0.971617  | -0.900356 | H            | -1.351252   | -0.535034 | -1.486914 |
| H            | -3.044677   | -0.341080 | -0.001062 | H            | 1.756099    | -1.493048 | 0.783825  |
| H            | -2.233701   | 0.969335  | 0.902273  | H            | 3.276380    | -0.427564 | 0.614955  |
| <b>Int2</b>  |             |           |           | <b>Int3</b>  |             |           |           |
|              | -875.838831 |           |           |              | -875.817126 |           |           |
| S            | -1.169569   | -0.591330 | -0.160631 | S            | 2.062467    | 0.361801  | 0.045902  |
| S            | 1.798142    | 0.372071  | -0.136666 | S            | -1.882323   | -0.480308 | -0.043277 |
| H            | -0.713495   | 1.774467  | -0.136703 | H            | -1.997811   | -0.622791 | 1.292461  |
| H            | -0.904771   | -0.485737 | -1.480764 | H            | -0.192209   | 1.232916  | 0.147224  |
| C            | 0.601737    | -0.785370 | 0.440779  | C            | -1.283692   | 1.207284  | -0.062458 |
| H            | 0.517957    | -0.757806 | 1.531865  | H            | -1.786881   | 1.818018  | 0.686068  |
| H            | 0.867579    | -1.809666 | 0.162505  | H            | -1.449388   | 1.612851  | -1.059315 |
| C            | -1.543426   | 1.146893  | 0.187615  | C            | 1.355015    | -1.046333 | -0.080011 |
| H            | -1.715655   | 1.226736  | 1.260311  | H            | 0.227970    | -1.116031 | -0.079010 |
| H            | -2.458650   | 1.391022  | -0.350827 | H            | 1.888082    | -1.994563 | -0.174620 |
| <b>Int4</b>  |             |           |           | <b>Int5a</b> |             |           |           |
|              | -875.854265 |           |           |              | -875.810153 |           |           |
| S            | -0.892391   | -0.571802 | -0.402311 | S            | -1.254408   | -0.517218 | -0.172741 |
| S            | 1.604356    | 0.445883  | -0.126605 | S            | 1.789576    | 0.288853  | -0.171524 |
| H            | 2.120607    | -0.502375 | -0.934291 | H            | 1.575472    | 1.314287  | 0.673155  |
| C            | 0.467301    | -0.642438 | 0.778331  | H            | -0.934201   | -0.388697 | -1.478129 |
| H            | 0.215545    | -0.207068 | 1.743127  | C            | 0.541656    | -0.782483 | 0.483843  |
| H            | 0.838655    | -1.658079 | 0.888877  | H            | 0.414807    | -0.735430 | 1.564273  |
| C            | -1.863439   | 0.825935  | 0.198254  | H            | 0.735841    | -1.812255 | 0.181236  |
| H            | -1.236885   | 1.712913  | 0.299783  | C            | -1.660506   | 1.127061  | 0.181194  |
| H            | -2.635181   | 1.008977  | -0.548516 | H            | -2.109051   | 1.314638  | 1.147430  |
| H            | -2.317347   | 0.559354  | 1.154179  | H            | -1.532450   | 1.893821  | -0.569940 |
| <b>Int5b</b> |             |           |           | <b>Int6</b>  |             |           |           |
|              | -875.810181 |           |           |              | -875.808270 |           |           |
| S            | 1.258123    | -0.516173 | -0.183428 | S            | -0.887188   | -0.727892 | 0.010953  |
| S            | -1.763269   | 0.381054  | -0.052317 | C            | -2.014600   | 0.674613  | 0.249823  |

|   |           |           |           |   |           |           |           |
|---|-----------|-----------|-----------|---|-----------|-----------|-----------|
| H | -2.111579 | -0.280112 | -1.171651 | H | -2.089367 | 1.287583  | -0.646527 |
| H | 0.937424  | -0.380785 | -1.487391 | H | -2.978424 | 0.188900  | 0.425501  |
| C | -0.535577 | -0.774967 | 0.490522  | H | -1.752535 | 1.259404  | 1.129399  |
| H | -0.735555 | -1.814810 | 0.232224  | S | 0.902914  | 0.347907  | -0.480144 |
| H | -0.386062 | -0.686539 | 1.565987  | C | 2.082343  | -0.003014 | 0.725218  |
| C | 1.666685  | 1.126485  | 0.180162  | H | 1.351945  | -0.450496 | -1.473094 |
| H | 1.435886  | 1.916145  | -0.520662 | H | 2.021044  | 0.574356  | 1.637934  |
| H | 2.155570  | 1.298894  | 1.129314  | H | 2.789243  | -0.809591 | 0.583590  |

**R-w**

-952.302748

|   |           |           |           |
|---|-----------|-----------|-----------|
| S | 0.785039  | 0.484494  | 0.515876  |
| C | 2.415745  | 0.668659  | -0.257131 |
| H | 2.305569  | 0.818378  | -1.330865 |
| H | 2.845714  | 1.560134  | 0.199790  |
| H | 3.037517  | -0.198933 | -0.037582 |
| S | 0.112703  | -1.158214 | -0.417231 |
| C | -1.495324 | -1.387154 | 0.385928  |
| H | -2.083820 | -0.476400 | 0.252200  |
| H | -1.950719 | -2.229949 | -0.134557 |
| H | -1.348756 | -1.631968 | 1.437816  |
| O | -2.196315 | 1.635323  | -0.255279 |
| H | -2.568538 | 1.923190  | -1.091955 |
| H | -2.552844 | 2.243450  | 0.396277  |

**Int1-w**

-952.269281

|   |           |           |           |
|---|-----------|-----------|-----------|
| S | -1.232312 | -0.209404 | -0.681805 |
| C | -2.187039 | -0.693522 | 0.784676  |
| H | -1.611315 | -0.543726 | 1.696011  |
| H | -3.100312 | -0.098804 | 0.812218  |
| H | -2.444631 | -1.744641 | 0.667907  |
| S | 1.291094  | -1.268760 | 0.047889  |
| C | 2.181734  | 0.065633  | 0.110629  |
| H | 0.119927  | 3.132079  | 0.974271  |
| H | 3.260769  | -0.018481 | 0.237682  |
| H | 1.745734  | 1.064899  | 0.035464  |
| O | 0.215742  | 2.658301  | 0.143547  |
| H | -0.833221 | 1.022034  | -0.264956 |
| H | 0.228438  | 3.338192  | -0.536148 |

**Int2-w**

-952.281175

|   |           |           |           |
|---|-----------|-----------|-----------|
| S | -0.654736 | -0.939649 | -0.577152 |
| S | 1.715386  | 0.842708  | 0.360567  |
| H | -0.041416 | -0.944857 | 1.750475  |
| H | -1.277765 | 0.260578  | -0.266288 |
| C | 1.052977  | -0.253102 | -0.860489 |
| H | 1.702702  | -1.124506 | -0.985752 |
| H | 0.992691  | 0.243488  | -1.833139 |
| C | -0.544387 | -1.646692 | 1.085754  |
| H | -0.002929 | -2.588398 | 1.010676  |
| H | -1.564303 | -1.834885 | 1.418917  |
| O | -1.928986 | 1.797725  | 0.071343  |
| H | -1.695441 | 2.378760  | 0.799587  |
| H | -2.703585 | 2.177843  | -0.351449 |

**Int3-w**

-952.253129

|   |           |           |           |
|---|-----------|-----------|-----------|
| S | 2.363162  | 0.369529  | -0.380218 |
| S | -1.265627 | -1.036626 | 0.601431  |
| H | -1.813990 | 0.174150  | 0.267716  |
| H | 0.450747  | -0.820548 | -1.064250 |
| C | -0.508067 | -1.383682 | -0.975646 |
| H | -1.149479 | -1.074451 | -1.800116 |
| H | -0.284063 | -2.447381 | -1.033540 |
| C | 1.619558  | 0.465289  | 1.014008  |
| H | 0.603971  | -0.000401 | 1.149542  |
| H | 2.029523  | 0.962697  | 1.893965  |
| O | -2.331008 | 1.853748  | -0.296236 |
| H | -2.664246 | 2.508426  | 0.322305  |
| H | -2.753903 | 2.051425  | -1.135314 |

**Int4-w**

-952.286018

|   |           |           |          |
|---|-----------|-----------|----------|
| S | -0.391680 | -0.208732 | 0.326315 |
|---|-----------|-----------|----------|

**Int5a-w**

-952.253712

|   |           |           |           |
|---|-----------|-----------|-----------|
| S | -0.809286 | -0.913095 | -0.514702 |
|---|-----------|-----------|-----------|

|   |           |           |           |   |           |           |           |
|---|-----------|-----------|-----------|---|-----------|-----------|-----------|
| S | 2.204456  | -0.246211 | -0.521769 | S | 1.767207  | 0.674564  | 0.273612  |
| H | 2.289838  | -1.572833 | -0.301330 | H | 1.952695  | -0.121047 | 1.342138  |
| C | 1.254116  | 0.156714  | 0.971411  | H | -1.237403 | 0.408225  | -0.345752 |
| H | 1.388911  | 1.206057  | 1.225053  | C | 1.027371  | -0.560585 | -0.782131 |
| H | 1.496023  | -0.483773 | 1.815640  | H | 1.508719  | -1.535271 | -0.720977 |
| C | -0.886013 | 1.391484  | -0.341135 | H | 1.063208  | -0.211986 | -1.814877 |
| H | -0.162099 | 1.730027  | -1.083508 | C | -0.938490 | -1.448276 | 1.129901  |
| H | -1.859647 | 1.224765  | -0.798286 | H | -0.692757 | -2.480456 | 1.339614  |
| H | -0.962858 | 2.108763  | 0.477885  | H | -1.378122 | -0.788225 | 1.864515  |
| O | -3.235795 | -0.570522 | -0.198768 | O | -1.687552 | 1.948481  | 0.002475  |
| H | -3.964788 | -0.415372 | 0.405935  | H | -1.084947 | 2.609343  | 0.353734  |
| H | -3.552040 | -1.243558 | -0.805644 | H | -2.491003 | 2.401233  | -0.267365 |

#### Int5b-w

-952.251746

|   |           |           |           |
|---|-----------|-----------|-----------|
| S | -1.820806 | 0.401925  | 0.360485  |
| S | 0.918932  | -0.855797 | -0.497575 |
| H | 1.262818  | 0.452031  | -0.202816 |
| H | -1.375879 | 1.615375  | -0.014767 |
| C | 0.962930  | -1.543951 | 1.092296  |
| H | 1.217018  | -0.927355 | 1.941959  |
| H | 0.779257  | -2.606245 | 1.174803  |
| C | -0.916764 | -0.518029 | -0.866663 |
| H | -0.880573 | -0.040072 | -1.845509 |
| H | -1.352063 | -1.511242 | -0.968685 |
| O | 1.396542  | 2.167253  | 0.045938  |
| H | 1.942260  | 2.720379  | -0.520541 |
| H | 1.387814  | 2.592938  | 0.907685  |

#### Int6-w

-952.252466

|   |           |           |           |
|---|-----------|-----------|-----------|
| S | 1.069092  | -0.659602 | -0.550041 |
| C | 2.581536  | -0.326942 | 0.397218  |
| H | 2.451125  | -0.564576 | 1.451475  |
| H | 3.313479  | -1.014878 | -0.032779 |
| H | 2.930315  | 0.693577  | 0.251165  |
| S | -0.305000 | 0.573371  | 0.531818  |
| C | -0.735606 | 1.890733  | -0.493286 |
| H | -2.851915 | -1.847783 | -0.509989 |
| H | -0.039317 | 2.715173  | -0.561835 |
| H | -1.646996 | 1.841814  | -1.074045 |
| O | -2.803873 | -1.065772 | 0.046480  |
| H | -1.446382 | -0.228159 | 0.359330  |
| H | -3.580381 | -1.072047 | 0.612805  |

#### R-2w

-1028.735046

|   |           |           |           |
|---|-----------|-----------|-----------|
| S | 0.853400  | -0.818231 | -0.326778 |
| C | 2.302470  | -1.817250 | 0.114230  |
| H | 2.536230  | -1.691179 | 1.171144  |
| H | 2.007295  | -2.848635 | -0.078877 |
| H | 3.152243  | -1.550063 | -0.513543 |
| S | 1.539950  | 1.013314  | 0.116923  |
| C | 0.153752  | 2.054805  | -0.404775 |
| H | -0.752650 | 1.692273  | 0.089176  |
| H | 0.417012  | 3.058341  | -0.069753 |
| H | 0.067645  | 2.031321  | -1.491054 |
| O | -1.793713 | 0.133311  | 1.019175  |
| H | -4.747769 | 0.005747  | -0.651496 |
| H | -2.049490 | 0.138653  | 1.942856  |

#### Inta

-1028.696372

|   |           |           |           |
|---|-----------|-----------|-----------|
| S | 1.039162  | -0.582771 | -0.463409 |
| C | 2.814740  | -0.719628 | -0.102107 |
| H | 2.989043  | -0.873284 | 0.961313  |
| H | 3.147608  | -1.599709 | -0.654206 |
| H | 3.340437  | 0.160233  | -0.467739 |
| S | 0.517752  | 1.083646  | 0.706263  |
| C | -0.513905 | 1.912361  | -0.373375 |
| H | -1.953872 | 0.927628  | -0.364627 |
| H | -0.919854 | 2.828493  | 0.049135  |
| H | -0.270025 | 1.900952  | -1.433107 |
| O | -2.733328 | 0.249695  | -0.296879 |
| H | -0.854888 | -2.027129 | 0.329178  |
| H | -3.244743 | 0.219858  | -1.115284 |

|   |           |           |           |   |           |           |           |
|---|-----------|-----------|-----------|---|-----------|-----------|-----------|
| O | -4.038523 | -0.602700 | -0.435767 | O | -1.818807 | -1.941254 | 0.368335  |
| H | -4.413900 | -1.482970 | -0.496822 | H | -2.153330 | -2.474878 | 1.094312  |
| H | -2.589660 | -0.145034 | 0.532056  | H | -2.378939 | -0.700083 | -0.003401 |

**Intb**

-1028.695420

|   |           |           |           |
|---|-----------|-----------|-----------|
| S | -1.079138 | -0.423348 | 0.591725  |
| C | -2.652305 | -0.809473 | -0.231648 |
| H | -2.502767 | -1.026536 | -1.287917 |
| H | -3.037812 | -1.694882 | 0.274891  |
| H | -3.348067 | 0.016317  | -0.093730 |
| S | -0.476681 | 1.240978  | -0.572653 |
| C | 0.683454  | 1.930345  | 0.477869  |
| H | 2.312965  | 0.691159  | 0.238690  |
| H | 1.160431  | 2.813979  | 0.064657  |
| H | 0.541012  | 1.870306  | 1.552770  |
| O | 2.845605  | -0.117153 | 0.063970  |
| H | 0.466237  | -1.683402 | -0.044465 |
| H | 3.564290  | 0.101104  | -0.537760 |
| O | 1.382916  | -1.997846 | -0.307524 |
| H | 1.611381  | -2.809979 | 0.160542  |
| H | 2.110371  | -1.165379 | -0.161717 |

**Int1-2w**

-1028.706511

|   |           |           |           |
|---|-----------|-----------|-----------|
| S | -0.845596 | 1.322834  | -0.460472 |
| C | -0.600240 | 2.061521  | 1.176580  |
| H | 0.009373  | 1.411014  | 1.801763  |
| H | -0.095501 | 3.018632  | 1.042606  |
| H | -1.577510 | 2.222162  | 1.627167  |
| S | -1.174636 | -1.349355 | 0.360955  |
| C | -2.503505 | -1.638919 | -0.491768 |
| H | 3.790132  | -2.063130 | 0.008788  |
| H | -2.962879 | -2.625810 | -0.466547 |
| H | -2.978161 | -0.878248 | -1.109723 |
| O | 3.471978  | -1.260342 | 0.427015  |
| H | 0.487110  | 1.046725  | -0.731985 |
| H | 4.067920  | -1.086115 | 1.158618  |
| O | 2.132545  | 0.717122  | -0.909974 |
| H | 2.716549  | 1.164322  | -1.524544 |
| H | 2.652967  | 0.024928  | -0.459070 |

**TS1**

-875.788305

1399.1971i

|   |           |           |           |
|---|-----------|-----------|-----------|
| S | -0.747369 | -0.228264 | -0.653846 |
| C | -1.886073 | 0.330266  | 0.638923  |
| H | -1.425965 | 1.104528  | 1.251187  |
| H | -2.775096 | 0.705085  | 0.129283  |
| H | -2.141494 | -0.539218 | 1.245557  |
| S | 1.085079  | -0.629030 | 0.336262  |
| C | 1.447225  | 1.061818  | -0.075281 |
| H | 0.122900  | 1.010893  | -0.890349 |
| H | 1.103214  | 1.827768  | 0.617840  |
| H | 2.346179  | 1.255141  | -0.654021 |

**TS2**

-875.809474

1323.7334i

|   |           |           |           |
|---|-----------|-----------|-----------|
| S | 0.847495  | 0.524315  | -0.441892 |
| S | -1.585540 | -0.461536 | -0.107563 |
| H | -0.301126 | -0.236754 | -1.182715 |
| C | -0.560631 | 0.806603  | 0.691453  |
| H | -0.298427 | 0.596348  | 1.726762  |
| H | -0.914525 | 1.826025  | 0.553012  |
| C | 1.789854  | -0.811747 | 0.348220  |
| H | 1.117323  | -1.535521 | 0.805326  |
| H | 2.386947  | -1.276532 | -0.436155 |
| H | 2.443194  | -0.347174 | 1.087012  |

**TS3**

-875.790020

1330.6418i

|   |           |           |           |
|---|-----------|-----------|-----------|
| S | -1.277431 | -0.432971 | -0.127152 |
| S | 1.619973  | 0.248255  | -0.134432 |
| H | 0.560558  | 1.242331  | 0.070703  |
| H | -1.079918 | -0.381850 | -1.464879 |

**TS4**

-875.793178

389.8803i

|   |           |           |           |
|---|-----------|-----------|-----------|
| S | -1.819690 | -0.444754 | -0.095449 |
| S | 1.825855  | 0.451673  | -0.182349 |
| H | 2.201937  | 0.793544  | 1.065796  |
| H | -0.668255 | -0.957279 | 0.502448  |

|   |           |           |           |
|---|-----------|-----------|-----------|
| C | 0.430584  | -1.006003 | 0.363474  |
| H | 0.352727  | -1.146321 | 1.442406  |
| H | 0.614546  | -1.966314 | -0.118971 |
| C | -1.000822 | 1.286271  | 0.224067  |
| H | -1.169791 | 1.541913  | 1.266279  |
| H | -1.337356 | 1.984096  | -0.535446 |

|   |           |           |           |
|---|-----------|-----------|-----------|
| C | 1.289952  | -1.125466 | 0.152577  |
| H | 1.495480  | -1.587412 | 1.111435  |
| H | 1.136060  | -1.762142 | -0.711131 |
| C | -1.516765 | 1.135083  | 0.171321  |
| H | -0.783470 | 1.478208  | 0.890942  |
| H | -2.119509 | 1.866665  | -0.358112 |

**TS5**

-875.771032

1591.4301i

|   |           |           |           |
|---|-----------|-----------|-----------|
| S | -0.788043 | 0.709922  | -0.144028 |
| C | -2.142090 | -0.444496 | 0.234208  |
| H | -2.048853 | -0.853692 | 1.238305  |
| H | -3.031126 | 0.188540  | 0.185493  |
| H | -2.225187 | -1.222476 | -0.523182 |
| S | 0.810903  | -0.632704 | -0.189320 |
| C | 2.200569  | 0.416177  | 0.223347  |
| H | 1.408987  | -0.614027 | 1.134266  |
| H | 3.170220  | 0.029317  | -0.063142 |
| H | 2.009335  | 1.406775  | 0.616487  |

**TS1-w**

-952.242238

71.5840i

|   |           |           |           |
|---|-----------|-----------|-----------|
| S | 0.884457  | 0.088938  | 0.693345  |
| C | 2.253872  | 0.089702  | -0.507682 |
| H | 1.923224  | 0.436259  | -1.485146 |
| H | 2.999649  | 0.770925  | -0.095952 |
| H | 2.681263  | -0.909608 | -0.568941 |
| S | -0.464856 | -1.224283 | -0.305653 |
| C | -1.965663 | -0.565202 | 0.184597  |
| H | -1.714602 | 1.337810  | -0.355179 |
| H | -2.808897 | -1.030239 | -0.317432 |
| H | -2.107869 | -0.269205 | 1.222781  |
| O | -0.996309 | 2.037444  | -0.357738 |
| H | -0.172657 | 1.539484  | 0.094172  |
| H | -1.272497 | 2.843536  | 0.103042  |

**TS2-w**

-952.245758

1404.1209i

|   |           |           |           |
|---|-----------|-----------|-----------|
| S | -0.052790 | 0.902689  | -0.645870 |
| S | -0.969163 | -1.360562 | 0.290390  |
| H | 0.369148  | -0.609252 | -0.390834 |
| C | -1.681311 | 0.250927  | -0.155244 |
| H | -2.105305 | 0.810049  | 0.676359  |
| H | -2.340554 | 0.232511  | -1.019827 |
| C | 0.585867  | 1.645254  | 0.874616  |
| H | 0.292689  | 1.042901  | 1.733635  |
| H | 1.669798  | 1.659038  | 0.767335  |
| H | 0.189351  | 2.658411  | 0.942137  |
| O | 2.389067  | -0.917832 | -0.134661 |
| H | 2.968400  | -1.117514 | -0.874625 |
| H | 2.767843  | -1.384606 | 0.614563  |

**TS3-w**

-952.234226

1343.6265i

|   |           |           |           |
|---|-----------|-----------|-----------|
| S | 0.413280  | 1.169261  | -0.434575 |
| S | -1.364708 | -1.112882 | 0.246532  |
| H | -0.906901 | -0.114456 | 1.225365  |
| H | 1.369964  | 0.153044  | -0.284863 |
| C | -0.969549 | 0.093288  | -1.040315 |
| H | -1.790746 | 0.774444  | -1.261959 |
| H | -0.635699 | -0.388203 | -1.959293 |
| C | -0.109575 | 1.218501  | 1.261596  |
| H | -0.865119 | 1.967968  | 1.477331  |
| H | 0.674750  | 1.058163  | 1.993742  |
| O | 2.325862  | -1.125793 | 0.046781  |
| H | 1.973870  | -2.003027 | 0.222061  |
| H | 3.270587  | -1.214380 | -0.105632 |

**TS4-w**

-952.227299

341.2419i

**TS5-w**

-952.233196

327.7980i

|   |           |           |           |   |           |           |           |
|---|-----------|-----------|-----------|---|-----------|-----------|-----------|
| S | -2.132366 | 0.022678  | 0.169424  | S | -1.103588 | -0.842763 | 0.110483  |
| S | 1.265500  | -1.095156 | -0.602837 | C | -2.596833 | 0.189482  | 0.218070  |
| H | 1.868348  | 0.031085  | -0.153448 | H | -2.882829 | 0.556206  | -0.766103 |
| H | -1.093937 | -0.539828 | 0.935789  | H | -3.371003 | -0.484529 | 0.589620  |
| C | 0.523721  | -1.541166 | 0.851789  | H | -2.463299 | 1.007150  | 0.924325  |
| H | 0.852649  | -1.107771 | 1.789824  | S | 0.259194  | 0.501764  | -0.721662 |
| H | 0.050325  | -2.516195 | 0.867963  | C | 0.935452  | 1.330558  | 0.645397  |
| C | -1.198159 | 1.067384  | -0.671775 | H | 2.551842  | -0.052347 | 0.805615  |
| H | -0.220720 | 1.397274  | -0.322685 | H | 1.536392  | 2.203240  | 0.402223  |
| H | -1.625329 | 1.517648  | -1.562535 | H | 0.427296  | 1.279715  | 1.602493  |
| O | 1.741725  | 2.031036  | 0.399085  | O | 2.830172  | -0.732148 | 0.130965  |
| H | 2.244876  | 2.610947  | -0.179416 | H | 2.066553  | -0.703588 | -0.523859 |
| H | 1.906482  | 2.360891  | 1.286353  | H | 2.972256  | -1.612920 | 0.516024  |

### TSa

-1028.694986  
220.9657i

|   |           |           |           |
|---|-----------|-----------|-----------|
| S | -1.062319 | -0.438812 | 0.592678  |
| C | -2.695066 | -0.773662 | -0.131436 |
| H | -2.616497 | -0.999892 | -1.193420 |
| H | -3.077329 | -1.644808 | 0.401710  |
| H | -3.353229 | 0.075475  | 0.043414  |
| S | -0.463422 | 1.190730  | -0.617789 |
| C | 0.661999  | 1.940252  | 0.427216  |
| H | 2.230545  | 0.728399  | 0.242631  |
| H | 1.144683  | 2.805382  | -0.018038 |
| H | 0.483843  | 1.935475  | 1.498595  |
| O | 2.803911  | -0.058109 | 0.063688  |
| H | 0.507124  | -1.740076 | -0.103666 |
| H | 3.569181  | -0.052654 | 0.646567  |
| O | 1.431726  | -1.964487 | -0.392362 |
| H | 1.678094  | -2.855456 | -0.122142 |
| H | 2.158746  | -1.101314 | -0.139162 |

### CH<sub>2</sub>=S<sup>+</sup>

-437.118516

|   |           |           |           |
|---|-----------|-----------|-----------|
| S | -0.576670 | -0.000005 | -0.000020 |
| C | 1.012338  | -0.000006 | 0.000048  |
| H | 1.576439  | -0.939759 | 0.000017  |
| H | 1.576246  | 0.939870  | 0.000017  |

### CH<sub>3</sub>SH<sup>+</sup>

### TSb

-1028.698808  
189.8139i

|   |           |           |           |
|---|-----------|-----------|-----------|
| S | -0.801193 | 1.092426  | -0.486534 |
| C | -0.632817 | 1.990325  | 1.081672  |
| H | 0.021132  | 1.449179  | 1.763167  |
| H | -0.208936 | 2.967898  | 0.851907  |
| H | -1.625503 | 2.109900  | 1.511292  |
| S | -1.211047 | -1.106288 | 0.358401  |
| C | -2.578070 | -1.594206 | -0.392556 |
| H | 3.779091  | -2.052515 | 0.139793  |
| H | -2.626885 | -2.613913 | -0.762751 |
| H | -3.437193 | -0.945021 | -0.532000 |
| O | 3.565107  | -1.171815 | 0.455627  |
| H | 0.581562  | 0.854930  | -0.725813 |
| H | 4.237827  | -0.942904 | 1.099953  |
| O | 2.116521  | 0.670903  | -0.879652 |
| H | 2.620969  | 1.026369  | -1.613859 |
| H | 2.666068  | -0.001554 | -0.424054 |

### CH<sub>3</sub>SH

-438.684029

|   |           |           |           |
|---|-----------|-----------|-----------|
| S | 0.662401  | -0.086850 | -0.000037 |
| C | -1.154822 | 0.019684  | 0.000050  |
| H | -1.523837 | 0.521422  | -0.893954 |
| H | -1.522753 | -1.006432 | -0.000120 |
| H | 0.900874  | 1.235395  | 0.000119  |
| H | -1.523775 | 0.521112  | 0.894253  |

### CH<sub>2</sub>=S

|             |           |           |           |             |           |           |
|-------------|-----------|-----------|-----------|-------------|-----------|-----------|
| -438.340265 |           |           |           | -437.460128 |           |           |
| S           | 0.645075  | -0.090473 | -0.000001 | S           | -0.583927 | -0.000032 |
| C           | -1.132607 | 0.011604  | -0.000008 | C           | 1.023745  | -0.000028 |
| H           | -1.454783 | 0.569511  | -0.888441 | H           | 1.600838  | -0.924698 |
| H           | -1.532422 | -1.000403 | -0.000185 | H           | 1.599527  | 0.925376  |
| H           | 0.916397  | 1.239712  | 0.000007  |             |           |           |
| H           | -1.454746 | 0.569133  | 0.888688  |             |           |           |

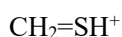

|             |           |           |           |
|-------------|-----------|-----------|-----------|
| -437.751678 |           |           |           |
| S           | 0.548185  | -0.091265 | 0.000002  |
| C           | -1.065295 | 0.025712  | -0.000007 |
| H           | -1.636192 | -0.900495 | 0.000002  |
| H           | -1.593392 | 0.975909  | 0.000026  |
| H           | 0.850393  | 1.230555  | -0.000016 |

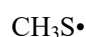

|             |           |           |           |
|-------------|-----------|-----------|-----------|
| -438.049569 |           |           |           |
| S           | -0.691427 | 0.000000  | -0.001896 |
| C           | 1.104640  | 0.000001  | -0.008760 |
| H           | 1.422078  | -0.000050 | 1.040691  |
| H           | 1.506453  | -0.898397 | -0.478934 |
| H           | 1.506459  | 0.898438  | -0.478855 |

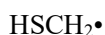

|             |           |           |           |
|-------------|-----------|-----------|-----------|
| -438.035133 |           |           |           |
| C           | -1.139476 | 0.021757  | -0.013668 |
| H           | -1.643625 | 0.973205  | 0.055894  |
| H           | -1.687096 | -0.908348 | 0.003097  |
| S           | 0.582286  | -0.088882 | 0.003707  |
| H           | 0.851006  | 1.226712  | -0.036298 |

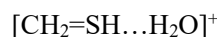

|             |           |           |           |
|-------------|-----------|-----------|-----------|
| -514.197674 |           |           |           |
| S           | 0.811913  | -0.604350 | -0.000071 |
| C           | 1.215036  | 0.960489  | 0.000081  |
| H           | -2.702236 | 0.107461  | -0.770933 |
| H           | 2.267802  | 1.230840  | 0.000661  |
| H           | 0.463271  | 1.745648  | -0.000366 |
| O           | -2.128194 | 0.142324  | -0.000063 |
| H           | -0.584473 | -0.421020 | -0.000843 |
| H           | -2.699642 | 0.105144  | 0.772629  |

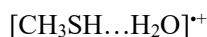

|             |           |           |           |
|-------------|-----------|-----------|-----------|
| -514.788127 |           |           |           |
| S           | 0.687935  | -0.710030 | -0.000001 |
| C           | 1.372624  | 0.937649  | -0.000027 |
| H           | 1.003781  | 1.468750  | -0.884692 |
| H           | 1.005022  | 1.468131  | 0.885554  |
| H           | 2.458012  | 0.873320  | -0.000722 |
| H           | -2.759934 | 0.241636  | 0.773217  |
| O           | -2.188483 | 0.222930  | -0.000013 |
| H           | -0.681614 | -0.342247 | 0.000029  |
| H           | -2.760117 | 0.241564  | -0.773108 |

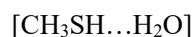

|             |           |           |           |
|-------------|-----------|-----------|-----------|
| -515.107091 |           |           |           |
| S           | -0.865052 | -0.721354 | -0.000006 |
| C           | -1.391105 | 1.022504  | -0.000003 |
| H           | -1.039187 | 1.539121  | 0.892420  |
| H           | -1.038372 | 1.539352  | -0.891970 |
| H           | -2.481138 | 1.024278  | -0.000509 |
| H           | 3.062919  | 0.017271  | -0.763397 |
| O           | 2.519988  | 0.218409  | -0.000005 |
| H           | 0.460162  | -0.478151 | 0.000353  |
| H           | 3.063181  | 0.017493  | 0.763258  |

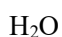

|            |          |           |           |
|------------|----------|-----------|-----------|
| -76.428204 |          |           |           |
| O          | 0.000000 | 0.000000  | 0.116318  |
| H          | 0.000000 | 0.760737  | -0.465272 |
| H          | 0.000000 | -0.760737 | -0.465272 |
